# Supplementary material
Source: PubMed Central journal article supplement (PMC3322232)
Supplement: mmc1.pdf [file mmc1.pdf]

**The American Journal of Human Genetics, Volume 90**

**Supplemental Data**

## **A “Copernican” Reassessment of the Human**

### **Mitochondrial DNA Tree from its Root**

**Doron M Behar, Mannis van Oven, Saharon Rosset, Mait Metspalu, Eva-Liis Loogväli, Nuno M Silva, Toomas Kivisild, Antonio Torroni, and Richard Villems**

Figure S1

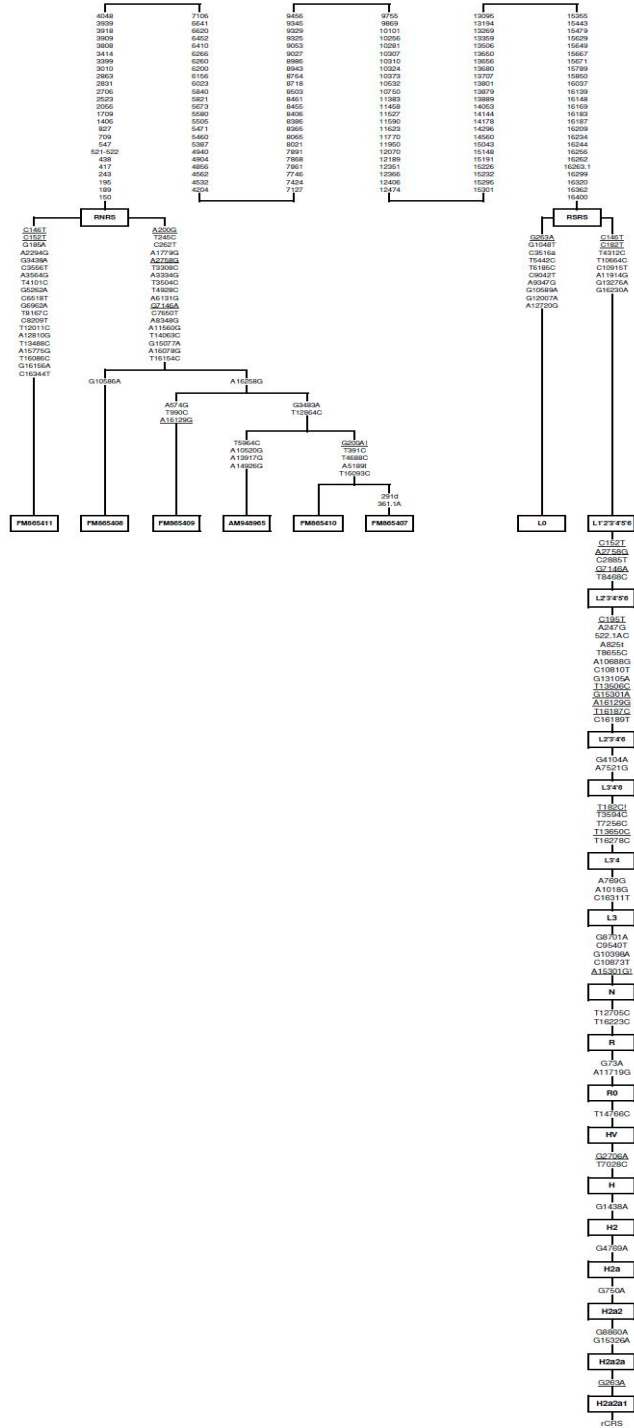

### **Figure S1. Unrooted mtDNA Phylogeny Relating Humans and Neanderthals**

The Neanderthal complete mtDNA phylogeny, the first split in the human phylogeny defining haplogroups L0 and L1'2'3'4'5'6, and the arrays of mutations leading to the rCRS are shown.

The array of mutations separating the RSRS and the RNRS is also shown but is not indicative for the phylogenetic occurrence of the mutations.

**Figure S2**

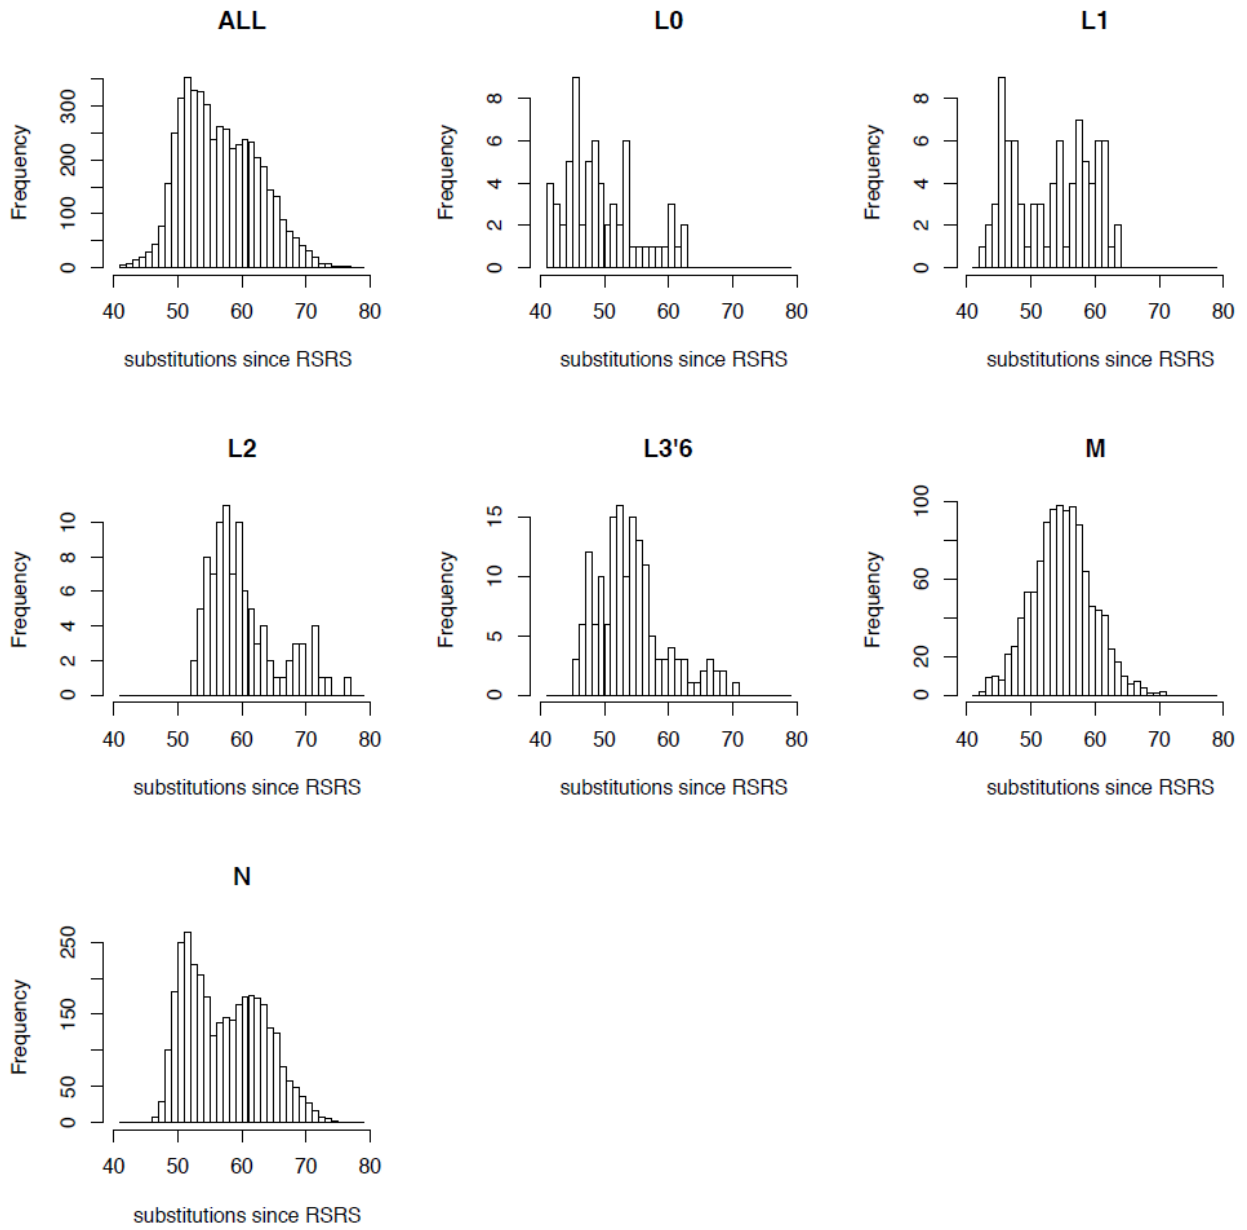

## **Figure S2. Distances in Substitution Counts from the RSRS to Extant Haplotypes**

A histogram representation of substitution counts separating the RSRS from contemporary mitogenomes subdivided according to their haplogroup affiliation. These counts were generated by considering the actual coalescence flow and are therefore larger than the mere number of substitution differences between the RSRS and each haplotype, as multiple substitutions at the same site, including reversions, are counted.

**Table S1. Root of the Human mtDNA Tree**

|       | L0 | L1'2'3'4'5'6 | Neanderthal | Final location |
|-------|----|--------------|-------------|----------------|
| 146   | C  | T            | C (5/6)     | L1'2'3'4'5'6   |
| 182   | C  | T            | C           | L1'2'3'4'5'6   |
| 263   | A  | G            | G           | L0             |
| 1048  | T  | C            | C           | L0             |
| 3516  | a  | C            | C           | L0             |
| 4312  | T  | C            | T           | L1'2'3'4'5'6   |
| 5442  | C  | T            | T           | L0             |
| 6185  | C  | T            | T           | L0             |
| 9042  | T  | C            | C           | L0             |
| 9347  | G  | A            | A           | L0             |
| 10589 | A  | G            | G           | L0             |
| 10664 | T  | C            | T           | L1'2'3'4'5'6   |
| 10915 | C  | T            | C           | L1'2'3'4'5'6   |
| 11914 | A  | G            | A           | L1'2'3'4'5'6   |
| 12007 | A  | G            | G           | L0             |
| 12720 | G  | A            | A           | L0             |
| 13276 | G  | A            | G           | L1'2'3'4'5'6   |
| 16230 | G  | A            | G           | L1'2'3'4'5'6   |

**Table S2. List of Indel Positions Identified in Mitogenomes**

| Serial | Indel  | Comment                          |
|--------|--------|----------------------------------|
| 1      | 42.1G  |                                  |
| 2      | 44.1C  |                                  |
| 3      | 54.1C  | Prone to various interpretations |
| 4      | 55.1T  | Prone to various interpretations |
| 5      | 56d    |                                  |
| 6      | 56.1A  | Prone to various interpretations |
| 7      | 56.1C  | Prone to various interpretations |
| 8      | 56.1G  | Prone to various interpretations |
| 9      | 57.1C  | Prone to various interpretations |
| 10     | 57.1G  | Prone to various interpretations |
| 11     | 60.XT  | Prone to various interpretations |
| 12     | 63d    |                                  |
| 13     | 64-65d |                                  |
| 14     | 65d    |                                  |
| 15     | 65.1T  | Prone to various interpretations |
| 16     | 65.2T  | Prone to various interpretations |
| 17     | 66.1T  | Prone to various interpretations |
| 18     | 70-71d |                                  |
| 19     | 71d    |                                  |
| 20     | 71.1G  |                                  |
| 21     | 89.1A  |                                  |

|    |          |                                 |
|----|----------|---------------------------------|
| 22 | 93.1T    |                                 |
| 23 | 105-110d |                                 |
| 24 | 106-111d |                                 |
| 25 | 115d     |                                 |
| 26 | 132.1A   |                                 |
| 27 | 166.1G   |                                 |
| 28 | 174.1T   |                                 |
| 29 | 186.1C   |                                 |
| 30 | 191-193d |                                 |
| 31 | 191.1A   |                                 |
| 32 | 194.1A   |                                 |
| 33 | 196d     | alone or combined with 191-193d |
| 34 | 242-244d |                                 |
| 35 | 247d     |                                 |
| 36 | 249d     |                                 |
| 37 | 249.1A   |                                 |
| 38 | 253-254d |                                 |
| 39 | 267d     |                                 |
| 40 | 270.1G   |                                 |
| 41 | 270.1T   |                                 |
| 42 | 273-274d |                                 |
| 43 | 290-291d |                                 |
| 44 | 291d     |                                 |



|    |                       |                                                                             |
|----|-----------------------|-----------------------------------------------------------------------------|
| 45 | 291.XA                |                                                                             |
| 46 | 291.1ACATCATAACAAAAAA |                                                                             |
| 47 | 292.XA                | combined with 294.1T                                                        |
| 48 | 294.1T                |                                                                             |
| 49 | 299.1C                |                                                                             |
| 50 | 299d                  |                                                                             |
| 51 | 306-309d              |                                                                             |
| 52 | 308-309d              |                                                                             |
| 53 | 308.1T                |                                                                             |
| 54 | 309d                  |                                                                             |
| 55 | 309.XC                | This polymorphism is usually ignored in analysis                            |
| 56 | 310C                  | This polymorphism creates an irresolvable poly C stretch at position 315.XC |
| 57 | 310.1T                |                                                                             |
| 58 | 311.1T                |                                                                             |
| 59 | 314.1T                |                                                                             |
| 60 | 315.XC                | This polymorphism is usually ignored in analysis                            |
| 61 | 337d                  |                                                                             |
| 62 | 356.1C                |                                                                             |
| 63 | 361.1A                |                                                                             |
| 64 | 368.1AGAA             |                                                                             |
| 65 | 374d                  |                                                                             |
| 66 | 377.1T                |                                                                             |

|    |                      |                                                                             |
|----|----------------------|-----------------------------------------------------------------------------|
| 67 | 382.1G               |                                                                             |
| 68 | 455d                 |                                                                             |
| 69 | 455.XT               |                                                                             |
| 70 | 459d                 |                                                                             |
| 71 | 459.1C               |                                                                             |
| 72 | 460C                 | This polymorphism creates an irresolvable poly C stretch at position 463.XC |
| 73 | 463.XC               | This polymorphism should be inferred from 460C and ignored                  |
| 74 | 471-478d             |                                                                             |
| 75 | 480.1TCCCATACTACCAAT |                                                                             |
| 76 | 490.1T               |                                                                             |
| 77 | 495-503d             |                                                                             |
| 78 | 498d                 |                                                                             |
| 79 | 498-511d             |                                                                             |
| 80 | 498.1C               |                                                                             |
| 81 | 511d                 |                                                                             |
| 82 | 521-522d             |                                                                             |
| 83 | 522.XCA              |                                                                             |
| 84 | 522.1AT              |                                                                             |
| 85 | 565.1T               |                                                                             |
| 86 | 568.1A               |                                                                             |
| 87 | 573d                 |                                                                             |

|     |         |                                                                             |
|-----|---------|-----------------------------------------------------------------------------|
| 88  | 573.XC  | This polymorphism notes a usually irresolvable number of poly C stretch     |
| 89  | 574.1A  |                                                                             |
| 90  | 595.1C  |                                                                             |
| 91  | 631.1A  |                                                                             |
| 92  | 745.1T  |                                                                             |
| 93  | 747.1A  |                                                                             |
| 94  | 960d    |                                                                             |
| 95  | 960.XC  | This polymorphism notes a usually irresolvable number of poly C stretch     |
| 96  | 961C    | This polymorphism creates an irresolvable poly C stretch at position 965.XC |
| 97  | 965d    |                                                                             |
| 98  | 965.XC  | This polymorphism should be inferred from 961C and ignored                  |
| 99  | 998d    |                                                                             |
| 100 | 1547.1T |                                                                             |
| 101 | 1656d   |                                                                             |
| 102 | 1719.1G |                                                                             |
| 103 | 2156.1A |                                                                             |
| 104 | 2232.XA |                                                                             |
| 105 | 2325.1T |                                                                             |
| 106 | 2395d   |                                                                             |

|     |            |                                                                         |
|-----|------------|-------------------------------------------------------------------------|
| 107 | 2405.1C    |                                                                         |
| 108 | 2887-2888d |                                                                         |
| 109 | 3158.1T    |                                                                         |
| 110 | 3172.1C    |                                                                         |
| 111 | 3229.1A    |                                                                         |
| 112 | 3307.1A    |                                                                         |
| 113 | 4317d      |                                                                         |
| 114 | 5752d      |                                                                         |
| 115 | 5752.1A    |                                                                         |
| 116 | 5786.1T    |                                                                         |
| 117 | 5813.1A    |                                                                         |
| 118 | 5892.XT    |                                                                         |
| 119 | 5899d      |                                                                         |
| 120 | 5899.XC    | This polymorphism notes a usually irresolvable number of poly C stretch |
| 121 | 7471d      |                                                                         |
| 122 | 7471.1C    |                                                                         |
| 123 | 7474d      |                                                                         |
| 124 | 7519d      |                                                                         |
| 125 | 7519.1A    |                                                                         |
| 126 | 7585.1T    |                                                                         |
| 127 | 8262-8271d |                                                                         |
| 128 | 8276d      |                                                                         |

|     |                |                                                                              |
|-----|----------------|------------------------------------------------------------------------------|
| 129 | 8276.1C        |                                                                              |
| 130 | 8277C          | This polymorphism creates an irresolvable poly C stretch at position 8278.XC |
| 131 | 8278.XC        | This polymorphism should be inferred from 8277C and ignored                  |
| 132 | 8279C          | This polymorphism creates an irresolvable poly C stretch at position 8279.XC |
| 133 | 8279.XC        | This polymorphism should be inferred from 8279C and ignored                  |
| 134 | 8281-8289d     |                                                                              |
| 135 | 8285.XC        | This polymorphism notes a usually irresolvable number of poly C stretch      |
| 136 | 8286C          | This polymorphism creates an irresolvable poly C stretch at position 8287.XC |
| 137 | 8287.XC        | This polymorphism should be inferred from 8287C and ignored                  |
| 138 | 8289.1CCCCTCTA |                                                                              |
| 139 | 10044.1A       |                                                                              |
| 140 | 10456d         |                                                                              |
| 141 | 12241d         |                                                                              |
| 142 | 12241.1C       |                                                                              |
| 143 | 12310.1A       |                                                                              |
| 144 | 13980-13985d   |                                                                              |

|     |                        |                                  |
|-----|------------------------|----------------------------------|
| 145 | 15937d                 |                                  |
| 146 | 15944d                 |                                  |
| 147 | 15944.1T               |                                  |
| 148 | 16032.1ATTCTCTGTTCTTTC |                                  |
| 149 | 16038.1A               |                                  |
| 150 | 16076d                 |                                  |
| 151 | 16094d                 |                                  |
| 152 | 16112d                 |                                  |
| 153 | 16166d                 |                                  |
| 154 | 16169.1C               |                                  |
| 155 | 16171d                 |                                  |
| 156 | 16172.1T               |                                  |
| 157 | 16179d                 |                                  |
| 158 | 16180.1T               |                                  |
| 159 | 16181.1T               |                                  |
| 160 | 16182.1C               |                                  |
| 161 | 16183d                 | Prone to various interpretations |
| 162 | 16184.1T               |                                  |
| 163 | 16186d                 | Prone to various interpretations |
| 164 | 16186.1T               |                                  |
| 165 | 16187.1T               |                                  |
| 166 | 16187.1TC              |                                  |
| 167 | 16188d                 |                                  |

|     |           |                                                                               |
|-----|-----------|-------------------------------------------------------------------------------|
| 168 | 16188.1A  |                                                                               |
| 169 | 16188.1G  |                                                                               |
| 170 | 16188.XC  |                                                                               |
| 171 | 16189d    | Prone to various interpretations                                              |
| 172 | 16189C    | This polymorphism creates an irresolvable poly C stretch at position 16193.XC |
| 173 | 16189.1A  |                                                                               |
| 174 | 16189.1G  |                                                                               |
| 175 | 16191.1A  |                                                                               |
| 176 | 16192.1T  |                                                                               |
| 177 | 16193d    | Prone to various interpretations                                              |
| 178 | 16193.XC  | This polymorphism should be inferred from 16189C and ignored                  |
| 179 | 16193.1TC |                                                                               |
| 180 | 16195d    |                                                                               |
| 181 | 16222.1A  |                                                                               |
| 182 | 16224.1T  |                                                                               |
| 183 | 16238.1A  |                                                                               |
| 184 | 16247.1T  |                                                                               |
| 185 | 16248.1A  |                                                                               |
| 186 | 16257d    |                                                                               |
| 187 | 16258d    |                                                                               |
| 188 | 16259.1A  |                                                                               |

|     |          |                                  |
|-----|----------|----------------------------------|
| 189 | 16262.1C |                                  |
| 190 | 16263d   |                                  |
| 191 | 16263.1A |                                  |
| 192 | 16264.1C |                                  |
| 193 | 16282.1T |                                  |
| 194 | 16285.1A |                                  |
| 195 | 16289.1T |                                  |
| 196 | 16292d   |                                  |
| 197 | 16293d   |                                  |
| 198 | 16294.1A |                                  |
| 199 | 16294.1G |                                  |
| 200 | 16296d   | Prone to various interpretations |
| 201 | 16296.1C |                                  |
| 202 | 16298d   |                                  |
| 203 | 16298.1G |                                  |
| 204 | 16300d   |                                  |
| 205 | 16300.1A |                                  |
| 206 | 16315.1T |                                  |
| 207 | 16316.1T |                                  |
| 208 | 16325d   |                                  |
| 209 | 16407.1T |                                  |
| 210 | 16469.1A |                                  |
| 211 | 16474d   |                                  |



|     |          |  |
|-----|----------|--|
| 212 | 16474.1G |  |
| 213 | 16482d   |  |
| 214 | 16484.1T |  |
| 215 | 16485.1T |  |
| 216 | 16535.1T |  |
| 217 | 16545d   |  |
| 218 | 16551.1G |  |

**Table S3. List of Nomenclature Inconsistencies in the Human mtDNA Phylogeny**

| Haplogroup | Ancestral (path to) haplogroup with different base-letter        |
|------------|------------------------------------------------------------------|
| A          | N                                                                |
| B          | R                                                                |
| C          | CZ                                                               |
| CZ         | M8 -> M                                                          |
| D          | M80'D -> M                                                       |
| E          | M9 -> M                                                          |
| F          | R9c -> R9 -> R                                                   |
| G          | M12'G->M                                                         |
| H          | HV                                                               |
| HV         | R0 -> R                                                          |
| I          | N1e'I -> N1a'e'I -> N1a'd'e'I -> N1a'c'd'e'I -> N1 -> N1'5 -> N  |
| J          | JT                                                               |
| JT         | R2'JT -> R                                                       |
| K          | U8b -> U8 -> U2'3'4'7'8'9 -> U                                   |
| L3         | L3'4 -> L3'4'6 -> L2'3'4'6 -> L2'3'4'5'6 -> L1'2'3'4'5'6 -> RSRS |
| M          | L3                                                               |
| N          | L3                                                               |
| O          | N                                                                |
| P          | R                                                                |
| Q          | M29'Q -> M                                                       |
| R          | N                                                                |

|                   |                                                        |
|-------------------|--------------------------------------------------------|
| S                 | N                                                      |
| T                 | JT                                                     |
| U                 | R                                                      |
| V                 | HV0a -> HV0 -> HV                                      |
| W                 | N2 -> N                                                |
| X                 | N                                                      |
| Y                 | N9 -> N                                                |
| Z                 | CZ                                                     |
| <b>Haplogroup</b> | <b>Ancestral haplogroup with different base-number</b> |
| D1                | D4                                                     |
| D2                | D4e1                                                   |
| D3                | D4b1c                                                  |
| A2                | A4                                                     |
| A6                | A4                                                     |
| B2                | B4b                                                    |

**Table S4. Molecular Clock Tests Results**

| <b>Haplogroup</b> | <b>Entire mtDNA GLR p-value(s)</b> | <b>Coding region only GLR p-value</b> |
|-------------------|------------------------------------|---------------------------------------|
| All samples       | 0.018                              | 0.005                                 |
| M                 | 0.0015,0.0003                      | 0.0003                                |
| N                 | 0.049                              | 0.054                                 |
| L2                | 0.00005                            | 0.033                                 |

**Table S5. PAML-Based Age Estimated**

| <b>Haplogroup</b> | <b>Time estimate (years)</b> | <b>SD (years)</b> |
|-------------------|------------------------------|-------------------|
| RSRS              | 176689.4                     | 11339.9           |
| L0                | 136289.1                     | 11753.6           |
| L0abfk            | 124793.8                     | 10669.5           |
| L0abf             | 100105.6                     | 9578.3            |
| L0ab              | 35971.5                      | 8073.3            |
| L0a               | 46740.8                      | 6932.3            |
| L0a14             | 39470.0                      | 8102.0            |
| L0a1              | 27911.8                      | 7859.5            |
| L0a1a             | 16795.7                      | 6169.2            |
| L0a1a2            | 7698.6                       | 4414.7            |
| L0a1b             | 12782.2                      | 6597.1            |
| L0a1b1            | 7502.6                       | 3066.8            |
| L0a1b1a           | 4153.4                       | 2674.5            |
| L0a1b1a1          | 1261.2                       | 1733.1            |
| L0a1b2            | 5178.5                       | 3202.3            |
| L0a1c             | 13854.6                      | 5598.6            |
| L0a1d             | 5387.4                       | 4265.0            |
| L0a2              | 29208.0                      | 5063.7            |
| L0a2a             | 20577.9                      | 5762.7            |
| L0a2a1            | 15840.0                      | 5748.4            |
| L0a2a1a           | 6847.2                       | 5491.7            |

|         |         |        |
|---------|---------|--------|
| L0a2a2  | 5921.5  | 3908.4 |
| L0a2a2a | 1602.4  | 2674.5 |
| L0a2b   | 3883.9  | 2731.6 |
| L0a2b1  | 1286.6  | 1711.7 |
| L0a2d   | 24103.9 | 5356.2 |
| L0f     | 68987.7 | 8751.0 |
| L0f1    | 2369.3  | 2339.3 |
| L0f2    | 56827.6 | 8843.7 |
| L0f2a   | 45968.6 | 9842.2 |
| L0f2a1  | 5377.0  | 4200.8 |
| L0k     | 36762.5 | 9442.8 |
| L0k1    | 8064.8  | 4643.0 |
| L0d     | 48421.7 | 9406.3 |
| L0d12   | 67569.0 | 8722.5 |
| L0d1    | 46161.4 | 7338.9 |
| L0d1a   | 15912.1 | 7453.0 |
| L0d1a1  | 5523.4  | 4086.7 |
| L0d1c   | 2428.0  | 2568.5 |
| L0d1c1  | 5074.1  | 3031.1 |
| L0d1c1a | 2538.6  | 2382.1 |
| L0d1c1b | 2543.7  | 2346.4 |
| L0d1b   | 25919.2 | 6939.5 |
| L0d1b1  | 14019.3 | 5919.6 |

|          |          |         |
|----------|----------|---------|
| L0d2     | 46715.8  | 7980.7  |
| L0d2ab   | 42817.1  | 8330.2  |
| L0d2a    | 6731.2   | 3608.8  |
| L0d2a1   | 4620.9   | 3188.0  |
| L0d2c    | 11022.9  | 5334.8  |
| L0d3     | 26989.2  | 8422.9  |
| L15      | 152971.1 | 10512.6 |
| L1       | 128520.9 | 11076.1 |
| L1b      | 4333.9   | 3515.3  |
| L1b1     | 9387.6   | 2310.8  |
| L1b1a14  | 5492.0   | 3180.9  |
| L1b1a2   | 7306.8   | 2831.4  |
| L1b1a2a  | 4194.9   | 3031.1  |
| L1b1a3   | 4980.2   | 2296.5  |
| L1b1a3a  | 2862.2   | 1840.1  |
| L1b1a3a1 | 1057.8   | 1383.6  |
| L1b1a3b  | 2492.4   | 1989.8  |
| L1b1a8   | 4200.1   | 2909.9  |
| L1b1a6   | 3935.7   | 3309.3  |
| L1b1a7   | 4896.8   | 3894.1  |
| L1c      | 77931.5  | 6946.6  |
| L1c1246  | 72161.7  | 6283.3  |
| L1c1     | 60112.3  | 7239.0  |

|            |         |        |
|------------|---------|--------|
| L1c1abd    | 55842.8 | 7902.3 |
| L1c1a      | 46641.0 | 8979.2 |
| L1c1a1     | 36581.3 | 8266.0 |
| L1c1a1a    | 24651.7 | 6989.4 |
| L1c1a1a1   | 10467.2 | 4949.6 |
| L1c1a1a1a  | 991.8   | 1405.0 |
| L1c1a1a1b  | 3222.6  | 2396.4 |
| L1c1a1a1b1 | 1144.2  | 1519.1 |
| L1c1a1a2   | 4792.6  | 4093.8 |
| L1c1a2     | 12329.9 | 4207.9 |
| L1c1a2a    | 5512.9  | 2867.1 |
| L1c1a2a1   | 3429.0  | 2424.9 |
| L1c1a2a2   | 2677.2  | 2446.3 |
| L1c1a2b    | 1169.6  | 1619.0 |
| L1c1a2c    | 1480.1  | 2296.5 |
| L1c1bd     | 51441.0 | 9870.7 |
| L1c1b      | 13509.3 | 5812.6 |
| L1c1d      | 29914.5 | 9143.3 |
| L1c1c      | 35604.5 | 8116.3 |
| L1c24      | 67582.1 | 6461.6 |
| L1c2       | 37943.3 | 5213.5 |
| L1c2a      | 29832.0 | 5677.1 |
| L1c2a1     | 26616.5 | 6119.3 |



|         |          |         |
|---------|----------|---------|
| L1c2a2  | 4652.1   | 3865.6  |
| L1c2b   | 35592.5  | 5070.9  |
| L1c2b1  | 31327.4  | 5234.9  |
| L1c2b1a | 29466.8  | 6233.4  |
| L1c2b1b | 17588.1  | 6483.0  |
| L1c2b2  | 25252.7  | 6725.5  |
| L1c4    | 32069.3  | 7773.9  |
| L1c4a   | 6173.5   | 3829.9  |
| L1c4b   | 18759.9  | 7652.7  |
| L1c3    | 50173.7  | 7624.1  |
| L1c3a   | 22508.5  | 4978.2  |
| L1c3a1  | 20924.1  | 4785.6  |
| L1c3a1a | 16556.4  | 4885.4  |
| L1c3a1b | 17225.0  | 4971.0  |
| L1c3bc  | 43693.3  | 7852.4  |
| L1c3b   | 12335.4  | 4807.0  |
| L1c3b1a | 2738.8   | 2931.3  |
| L1c3b1b | 8102.0   | 4072.4  |
| L25     | 139216.8 | 9685.3  |
| L5      | 110805.3 | 11796.4 |
| L5a     | 25061.9  | 6982.3  |
| L5a1    | 14839.3  | 5227.8  |
| L5a1a   | 5021.9   | 4778.5  |

|          |          |        |
|----------|----------|--------|
| L5a1b    | 10526.4  | 4635.8 |
| L5c      | 20260.7  | 7139.2 |
| L5c1     | 8107.3   | 4528.8 |
| L26      | 111246.6 | 8130.5 |
| L2       | 88453.2  | 7838.1 |
| L2ad     | 84118.8  | 7545.7 |
| L2a      | 79304.6  | 8308.8 |
| L2a14    | 45707.4  | 8472.9 |
| L2a1     | 23821.9  | 5584.4 |
| L2a1a    | 10063.6  | 2788.6 |
| L2a1a1   | 3501.3   | 2646.0 |
| L2a1a2   | 7942.7   | 2496.2 |
| L2a1a2a  | 6573.2   | 2474.8 |
| L2a1a2a1 | 4117.1   | 2210.9 |
| L2a1a3   | 6936.9   | 3230.8 |
| L2a1b    | 5800.9   | 3972.5 |
| L2a1f    | 5267.2   | 2745.8 |
| L2a1f1   | 4065.2   | 2403.5 |
| L2a1c    | 14156.6  | 3423.4 |
| L2a1c1   | 7053.1   | 2881.3 |
| L2a1c1a  | 5586.2   | 2703.0 |
| L2a1c3   | 11591.2  | 5912.5 |
| L2a1c4   | 4917.7   | 3680.1 |

|          |         |        |
|----------|---------|--------|
| L2a1c5   | 6210.2  | 4978.2 |
| L2a1d    | 7476.1  | 3772.8 |
| L2a1e    | 11824.5 | 4714.3 |
| L2a1e1   | 7232.7  | 4086.7 |
| L2a1h    | 12183.0 | 5042.3 |
| L2a1i    | 9312.7  | 4129.4 |
| L2a1j    | 5168.0  | 4307.7 |
| L2a1k    | 9312.7  | 4043.9 |
| L2a1l    | 9784.3  | 3544.6 |
| L2a1l1   | 6236.5  | 3494.7 |
| L2a1l2   | 8458.5  | 3601.7 |
| L2a1l2a  | 2374.4  | 2146.7 |
| L2a1l2a1 | 920.7   | 1897.1 |
| L2a1m    | 5272.5  | 3837.0 |
| L2a234   | 33475.7 | 7324.6 |
| L2a23    | 23167.1 | 6483.0 |
| L2a2     | 21003.6 | 5170.7 |
| L2a2a    | 10833.9 | 4429.0 |
| L2a2a1   | 8043.6  | 4172.2 |
| L2a2b    | 15651.7 | 4992.4 |
| L2a2b1   | 3336.1  | 3430.5 |
| L2a4     | 2564.2  | 2553.3 |
| L2a5     | 1317.2  | 1989.8 |

|        |         |        |
|--------|---------|--------|
| L2bcd  | 5294.2  | 3742.7 |
| L2bc   | 56949.3 | 8344.5 |
| L2b    | 21259.4 | 5270.6 |
| L2b1   | 13399.8 | 4179.4 |
| L2b1a  | 10887.9 | 3195.2 |
| L2b1a2 | 8906.4  | 3366.3 |
| L2b1a3 | 6499.5  | 4172.2 |
| L2b1b  | 2589.9  | 3637.3 |
| L2b3   | 21259.4 | 6347.5 |
| L2b3a  | 9709.2  | 4921.1 |
| L2c    | 17761.5 | 4585.9 |
| L2c2   | 11131.0 | 3594.5 |
| L2c2a  | 5345.6  | 4015.3 |
| L2c2b  | 7741.0  | 3394.8 |
| L2c3   | 15568.6 | 4757.1 |
| L2d    | 17001.9 | 5883.9 |
| L2d1   | 15021.4 | 5634.3 |
| L2d1a  | 5612.4  | 3630.2 |
| L36    | 71383.9 | 6163.2 |
| L6     | 22331.2 | 6154.9 |
| L6a    | 18282.5 | 5812.6 |
| L6b    | 17029.7 | 6105.0 |
| L34    | 64401.1 | 5069.0 |

|         |         |         |
|---------|---------|---------|
| L4      | 78996.2 | 7353.1  |
| L4a     | 39811.7 | 7531.4  |
| L4a1    | 22977.9 | 6511.5  |
| L4a1a   | 16600.9 | 5727.0  |
| L4a2    | 29767.1 | 8408.7  |
| L4b     | 77142.7 | 7524.3  |
| L4b2    | 46740.8 | 7424.4  |
| L4b2a   | 43526.5 | 7224.7  |
| L4b2a1  | 15093.1 | 7324.6  |
| L4b2a2  | 28140.1 | 5320.5  |
| L4b2a2a | 21458.6 | 5734.2  |
| L4b2a2b | 15496.7 | 5798.3  |
| L3      | 67262.0 | 4433.6  |
| L3a     | 49689.3 | 8879.4  |
| L3bf    | 63051.8 | 10377.1 |
| L3b     | 21538.3 | 5349.0  |
| L3b1    | 17258.5 | 4578.8  |
| L3b1a   | 13931.5 | 3095.3  |
| L3b1a1  | 8869.0  | 4564.5  |
| L3b1a1a | 4735.4  | 3944.0  |
| L3b1a2  | 12422.5 | 3430.5  |
| L3b1a3  | 7227.4  | 4429.0  |
| L3b1a4  | 8123.3  | 4250.7  |

|          |         |        |
|----------|---------|--------|
| L3b1b    | 7148.2  | 3794.2 |
| L3b1b1   | 5324.7  | 3295.0 |
| L3b3     | 3728.7  | 4179.4 |
| L3f      | 46304.6 | 6910.9 |
| L3f1     | 40013.2 | 6918.1 |
| L3f1a    | 24086.7 | 7246.1 |
| L3f1b    | 11358.3 | 3273.6 |
| L3f1b1   | 2359.1  | 2467.7 |
| L3f1b2   | 9066.7  | 3537.5 |
| L3f1b2a  | 3847.7  | 3387.7 |
| L3f1b4   | 8064.8  | 3223.7 |
| L3f1b4a  | 4891.6  | 2909.9 |
| L3f1b4a1 | 2477.0  | 2859.9 |
| L3f2     | 42379.9 | 8266.0 |
| L3f2b    | 25432.2 | 7239.0 |
| L3f3     | 5743.3  | 4878.3 |
| L3f3a    | 3542.6  | 3423.4 |
| L3cdj    | 54573.7 | 8137.6 |
| L3c      | 9243.1  | 5505.9 |
| L3d      | 25739.3 | 4029.6 |
| L3d1     | 23672.4 | 3651.6 |
| L3d1a    | 16284.0 | 4129.4 |
| L3d1a1   | 13684.6 | 4001.1 |

|         |         |        |
|---------|---------|--------|
| L3d1a1a | 3356.7  | 3309.3 |
| L3d1b   | 19898.6 | 4207.9 |
| L3d1b1  | 15862.2 | 5170.7 |
| L3d1b2  | 7783.5  | 4607.3 |
| L3d1c   | 12607.7 | 4471.8 |
| L3d2    | 13964.4 | 6732.6 |
| L3d3    | 18546.3 | 5798.3 |
| L3d4    | 18338.6 | 6968.0 |
| L3eikx  | 49720.8 | 5734.2 |
| L3e     | 36189.0 | 5612.9 |
| L3e1    | 14569.3 | 3038.2 |
| L3e1a   | 13252.0 | 3259.3 |
| L3e1a2  | 951.2   | 1326.6 |
| L3e1a3  | 9983.0  | 4158.0 |
| L3e1b   | 12232.0 | 3772.8 |
| L3e1c   | 8112.7  | 4108.1 |
| L3e1d   | 9173.6  | 4329.1 |
| L3e1e   | 10779.9 | 4286.4 |
| L3e1f   | 14569.3 | 7702.6 |
| L3e2    | 19796.9 | 7146.3 |
| L3e2a   | 10052.8 | 5042.3 |
| L3e2a1  | 8298.8  | 3530.4 |
| L3e2a1a | 1047.7  | 2439.2 |

|          |         |        |
|----------|---------|--------|
| L3e2a1b  | 5816.6  | 2710.2 |
| L3e2a1b1 | 2128.6  | 1961.3 |
| L3e2a1b2 | 2815.9  | 2567.5 |
| L3e2b    | 11531.6 | 3252.2 |
| L3e2b1   | 9098.7  | 3501.8 |
| L3e2b1a  | 7354.4  | 3287.9 |
| L3e2b1a1 | 5444.9  | 3993.9 |
| L3e2b2   | 8975.8  | 3715.8 |
| L3e2b3   | 3155.6  | 3059.6 |
| L3e345   | 32503.6 | 5484.5 |
| L3e34    | 30292.1 | 5477.4 |
| L3e3     | 11569.5 | 4457.5 |
| L3e3a    | 1663.6  | 3451.9 |
| L3e3b    | 3635.6  | 2118.2 |
| L3e3b1   | 2436.0  | 1975.6 |
| L3e3b2   | 1235.7  | 1640.4 |
| L3e4     | 16857.0 | 5891.1 |
| L3e5     | 14453.6 | 6896.7 |
| L3i      | 41231.1 | 8658.3 |
| L3i1     | 13077.1 | 6910.9 |
| L3i2     | 1485.2  | 4749.9 |
| L3k      | 23983.0 | 6882.4 |
| L3k1     | 5105.4  | 4122.3 |



|         |         |        |
|---------|---------|--------|
| L3x     | 36750.4 | 5655.7 |
| L3x1    | 28884.8 | 6618.5 |
| L3x2    | 29355.0 | 5862.5 |
| L3x2a   | 21840.3 | 5356.2 |
| L3x2a1  | 15502.2 | 4578.8 |
| L3x2a1a | 7661.5  | 3951.1 |
| L3h     | 59422.4 | 4899.7 |
| L3h1    | 47083.8 | 5933.9 |
| L3h1a   | 40141.5 | 6326.1 |
| L3h1a2a | 16050.8 | 6076.5 |
| L3h1a2b | 34799.1 | 7510.0 |
| L3h1b   | 38289.3 | 6426.0 |
| L3h1b1  | 35773.1 | 6361.8 |
| L3h1b1a | 29061.0 | 6639.9 |
| L3h1b2  | 12755.0 | 5527.3 |
| M       | 49590.1 | 1824.0 |
| M12051  | 47641.3 | 2851.2 |
| M1      | 23679.9 | 4377.6 |
| M1a     | 19183.0 | 3225.6 |
| M1a1    | 12910.6 | 3340.8 |
| M1a1a   | 1199.6  | 6019.2 |
| M1a1b   | 7852.4  | 3072.0 |
| M1a1b1  | 5751.4  | 3369.6 |

|        |         |         |
|--------|---------|---------|
| M1a1c  | 0.0     | 11692.8 |
| M1a1d  | 5244.5  | 4416.0  |
| M1a1e  | 9813.6  | 4022.4  |
| M1a2   | 16732.9 | 4051.2  |
| M1a2a  | 4648.1  | 4531.2  |
| M1a2b  | 9712.4  | 4972.8  |
| M1a3   | 11198.9 | 4944.0  |
| M1a3a  | 6592.8  | 5040.0  |
| M1a3b  | 8761.9  | 4800.0  |
| M1a4   | 9922.0  | 5049.6  |
| M1a5   | 4207.5  | 3475.2  |
| M1b    | 20323.5 | 4876.8  |
| M1b1   | 7566.9  | 4416.0  |
| M1b1a  | 2519.8  | 2515.2  |
| M1b2   | 12932.6 | 5644.8  |
| M1b2a  | 6897.9  | 4828.8  |
| M51    | 26435.1 | 5750.4  |
| M51a   | 24253.2 | 5635.2  |
| M51a1  | 18547.0 | 5433.6  |
| M51a1a | 7381.6  | 4358.4  |
| M2     | 36278.4 | 6086.4  |
| M2a    | 29633.4 | 5904.0  |
| M2a1   | 17213.1 | 4329.6  |

|           |         |        |
|-----------|---------|--------|
| M2a1a     | 13639.5 | 3552.0 |
| M2a1a1    | 5617.5  | 3427.2 |
| M2a1a1a   | 4200.5  | 3312.0 |
| M2a1a1a1  | 980.8   | 1420.8 |
| M2a1a1b   | 2416.2  | 3158.4 |
| M2a1a1b1  | 932.9   | 2784.0 |
| M2a1a2    | 10196.9 | 5289.6 |
| M2a1a2a   | 7545.5  | 4627.2 |
| M2a1a2a1  | 1549.2  | 2121.6 |
| M2a1a2a1a | 0.0     | 4992.0 |
| M2a1a3    | 7360.2  | 5683.2 |
| M2a1a3a   | 2997.1  | 2409.6 |
| M2a1a3a1  | 1090.2  | 2140.8 |
| M2a1a3b   | 3392.6  | 2774.4 |
| M2a1b     | 1179.1  | 1776.0 |
| M2a1c     | 11111.5 | 4828.8 |
| M2a2      | 6741.8  | 4329.6 |
| M2a2a     | 1309.2  | 2534.4 |
| M2a3      | 14267.6 | 6182.4 |
| M2a3a     | 11636.2 | 6009.6 |
| M2b       | 14245.4 | 3926.4 |
| M2b1      | 12111.3 | 3734.4 |
| M2b1a     | 1988.9  | 1958.4 |

|         |         |        |
|---------|---------|--------|
| M2b1b   | 823.7   | 1824.0 |
| M2b2    | 9813.6  | 8227.2 |
| M3      | 23904.4 | 7132.8 |
| M3a     | 15351.2 | 5596.8 |
| M3a1    | 6055.0  | 6048.0 |
| M3a2    | 10016.0 | 4300.8 |
| M3a2a   | 1343.5  | 2064.0 |
| M3b     | 1872.0  | 2601.6 |
| M3c     | 21907.1 | 7228.8 |
| M3c1    | 13964.4 | 6057.6 |
| M3c1a   | 11526.8 | 6355.2 |
| M3c1b   | 9114.2  | 4435.2 |
| M3c1b1  | 4606.1  | 3552.0 |
| M3c1b1a | 1042.3  | 1440.0 |
| M3c1b1b | 1418.8  | 2544.0 |
| M3c2    | 17070.4 | 7296.0 |
| M467    | 34529.5 | 4204.8 |
| M4      | 12734.3 | 7315.2 |
| M65     | 25256.0 | 6528.0 |
| M65a    | 17694.4 | 6172.8 |
| M65b    | 8711.7  | 5990.4 |
| M67     | 1131.2  | 1584.0 |
| M1838   | 32198.5 | 4588.8 |

|        |         |        |
|--------|---------|--------|
| M18    | 18773.9 | 7094.4 |
| M18a   | 9799.1  | 5472.0 |
| M18b   | 10530.3 | 5040.0 |
| M38    | 26724.8 | 5529.6 |
| M38a   | 14697.4 | 6211.2 |
| M38b   | 8690.1  | 4262.4 |
| M38c   | 5237.5  | 4022.4 |
| M30    | 17431.1 | 4012.8 |
| M30a   | 6699.2  | 3801.6 |
| M30a1  | 5328.9  | 3292.8 |
| M30a2  | 1693.3  | 2659.2 |
| M30b   | 11315.4 | 4684.8 |
| M30c   | 11359.1 | 7401.6 |
| M30c1  | 11359.1 | 6249.6 |
| M30c1a | 6656.6  | 4416.0 |
| M30d   | 9351.8  | 6940.8 |
| M30d1  | 5892.5  | 5030.4 |
| M30e   | 2630.3  | 5260.8 |
| M30f   | 13772.4 | 4118.4 |
| M37    | 29269.0 | 7027.2 |
| M37a   | 9366.2  | 5673.6 |
| M37a1  | 3552.4  | 3686.4 |
| M37d   | 3552.4  | 6355.2 |

|         |         |         |
|---------|---------|---------|
| M37e    | 15641.7 | 7228.8  |
| M37e2   | 11337.3 | 6537.6  |
| M43     | 25965.9 | 5654.4  |
| M43a    | 21538.9 | 6355.2  |
| M45     | 28171.0 | 6624.0  |
| M45a    | 11701.9 | 5904.0  |
| M64     | 12624.2 | 5289.6  |
| M66     | 17378.4 | 7833.6  |
| M5      | 37067.2 | 14803.2 |
| M5ad    | 23347.5 | 7814.4  |
| M5a     | 17370.9 | 4425.6  |
| M5a1    | 11869.9 | 4425.6  |
| M5a1b   | 7246.3  | 4041.6  |
| M5a2    | 13536.3 | 4339.2  |
| M5a2a   | 11475.7 | 3532.8  |
| M5a2a1  | 8740.4  | 4185.6  |
| M5a2a1a | 6267.1  | 4512.0  |
| M5a2a2  | 7061.4  | 4089.6  |
| M5a2a3  | 1665.8  | 2352.0  |
| M5a3    | 7517.0  | 10924.8 |
| M5a3a   | 0.0     | 13574.4 |
| M5a3b   | 1384.6  | 7891.2  |
| M5a4    | 10312.8 | 4972.8  |

|         |         |         |
|---------|---------|---------|
| M5a5    | 1906.4  | 10473.6 |
| M5d     | 13602.6 | 5664.0  |
| M5bc    | 37067.2 | 7459.2  |
| M5b     | 32062.4 | 7036.8  |
| M5b1    | 15731.2 | 7872.0  |
| M5b2    | 23208.4 | 6364.8  |
| M5b2a   | 16972.9 | 6432.0  |
| M5b2b   | 20407.3 | 6412.8  |
| M5c     | 31542.9 | 7430.4  |
| M5c1    | 17649.3 | 7401.6  |
| M6      | 20659.1 | 6614.4  |
| M6a1    | 14104.9 | 5961.6  |
| M7      | 44926.1 | 3484.8  |
| M7a     | 22707.1 | 5385.6  |
| M7a1    | 17213.1 | 4464.0  |
| M7a1a   | 10139.0 | 2236.8  |
| M7a1a1  | 5146.1  | 3043.2  |
| M7a1a1a | 2561.2  | 2390.4  |
| M7a1a2  | 4487.1  | 2649.6  |
| M7a1a3  | 5061.8  | 3321.6  |
| M7a1a4  | 7338.9  | 2620.8  |
| M7a1a4a | 2064.7  | 2179.2  |
| M7a1a5  | 6210.5  | 3532.8  |

|        |         |        |
|--------|---------|--------|
| M7a1a6 | 7025.8  | 3993.6 |
| M7a1a7 | 7032.9  | 4579.2 |
| M7a1a8 | 7025.8  | 3705.6 |
| M7a1b  | 12118.6 | 4531.2 |
| M7a2   | 19061.7 | 5865.6 |
| M7a2a  | 13838.8 | 5692.8 |
| M7a2a1 | 5328.9  | 4732.8 |
| M7a2a2 | 8095.4  | 5299.2 |
| M7bg   | 42895.5 | 3811.2 |
| M7bdg  | 40828.0 | 4214.4 |
| M7bd   | 31542.9 | 5750.4 |
| M7b    | 23563.9 | 5366.4 |
| M7b124 | 16680.5 | 5404.8 |
| M7b1   | 13278.4 | 6892.8 |
| M7b2   | 7047.2  | 3004.8 |
| M7b2a  | 3101.1  | 3686.4 |
| M7b2b  | 4102.8  | 2880.0 |
| M7b2c  | 3101.1  | 3292.8 |
| M7b4   | 7061.4  | 4819.2 |
| M7b3   | 10907.9 | 4396.8 |
| M7b3a  | 9596.9  | 4089.6 |
| M7d    | 2886.3  | 3859.2 |
| M7g    | 19281.6 | 6806.4 |



|        |         |        |
|--------|---------|--------|
| M7cef  | 31064.2 | 5654.4 |
| M7c    | 22953.7 | 4828.8 |
| M7c1   | 17581.5 | 4627.2 |
| M7c1a  | 8260.0  | 6124.8 |
| M7c1b  | 8711.7  | 4214.4 |
| M7c1b1 | 6720.5  | 3657.6 |
| M7c1d  | 6557.4  | 3840.0 |
| M7c2   | 19592.9 | 5308.8 |
| M7c2a  | 4193.5  | 5664.0 |
| M7c3   | 16179.1 | 6278.4 |
| M7c3b  | 11249.8 | 6019.2 |
| M7c3c  | 10537.5 | 4608.0 |
| M7c3c1 | 8345.9  | 4300.8 |
| M7e    | 6408.6  | 5769.6 |
| M8     | 36473.3 | 7276.8 |
| M8a    | 20506.5 | 7670.4 |
| M8a23  | 17017.9 | 6134.4 |
| M8a2   | 13285.7 | 6566.4 |
| M8a2a  | 7588.3  | 3763.2 |
| M8a2b  | 3900.5  | 4176.0 |
| M8a3   | 14386.1 | 6038.4 |
| CZ     | 36473.3 | 7392.0 |
| C      | 23912.2 | 4780.8 |

|        |         |        |
|--------|---------|--------|
| C1     | 18252.3 | 4233.6 |
| C1a    | 4837.3  | 5376.0 |
| C1b    | 14793.8 | 3043.2 |
| C1b1   | 12030.8 | 3888.0 |
| C1b2   | 1288.7  | 1958.4 |
| C1b4   | 1083.3  | 1516.8 |
| C1b5   | 10421.5 | 3360.0 |
| C1b5a  | 6316.6  | 3676.8 |
| C1b5b  | 7054.3  | 3177.6 |
| C1b6   | 1425.7  | 1987.2 |
| C1c    | 12873.8 | 3859.2 |
| C1c1   | 7274.8  | 4416.0 |
| C1c1b  | 4907.4  | 3590.4 |
| C1c2   | 2533.6  | 2419.2 |
| C1c3   | 2720.2  | 2284.8 |
| C1c4   | 6118.6  | 3830.4 |
| C1d    | 15500.2 | 5232.0 |
| C1d1   | 11381.0 | 3993.6 |
| C1d1a  | 6437.0  | 3993.6 |
| C1d1a1 | 1275.0  | 1756.8 |
| C1d1b  | 6670.8  | 4176.0 |
| C1d1b1 | 3949.3  | 3561.6 |
| C1d1c  | 6869.5  | 4790.4 |

|        |         |        |
|--------|---------|--------|
| C1d1c1 | 3191.2  | 2899.2 |
| C1d2   | 10755.3 | 4483.2 |
| C1d2a  | 4263.4  | 4128.0 |
| C4     | 18728.5 | 5836.8 |
| C4abc  | 18728.5 | 3542.4 |
| C4a    | 17717.0 | 3427.2 |
| C4a15  | 16029.7 | 3638.4 |
| C4a1   | 11300.8 | 3907.2 |
| C4a1a  | 5033.7  | 2956.8 |
| C4a1c  | 4270.3  | 2620.8 |
| C4a1c1 | 1357.2  | 2102.4 |
| C4a1d  | 4319.3  | 2947.2 |
| C4a5   | 6890.8  | 4540.8 |
| C4a234 | 16396.0 | 3360.0 |
| C4a2   | 4123.7  | 3129.6 |
| C4a3   | 10617.3 | 3772.8 |
| C4a3a  | 6012.6  | 3734.4 |
| C4a4   | 10066.6 | 4224.0 |
| C4a4a  | 1042.3  | 1545.6 |
| C4b    | 6997.4  | 2620.8 |
| C4b1   | 2713.3  | 2246.4 |
| C4b1a  | 1569.7  | 1881.6 |
| C4b2   | 1329.8  | 1891.2 |

|        |         |        |
|--------|---------|--------|
| C4b3   | 4858.3  | 2995.2 |
| C4b3a  | 2464.6  | 2524.8 |
| C4b5   | 1720.8  | 8457.6 |
| C4b6   | 3087.2  | 2736.0 |
| C4b7   | 1329.8  | 1824.0 |
| C4b8   | 1995.8  | 1929.6 |
| C4c    | 13359.4 | 3955.2 |
| C4c1   | 10095.5 | 4550.4 |
| C4e    | 3177.4  | 3148.8 |
| C5     | 17890.3 | 7785.6 |
| C5a    | 8920.0  | 5404.8 |
| C5a1   | 1501.1  | 2131.2 |
| C5a2   | 2333.4  | 5088.0 |
| C5b    | 17890.3 | 8275.2 |
| C5b1   | 13646.9 | 4963.2 |
| C5b1a  | 7545.5  | 3542.4 |
| C5b1a1 | 1768.9  | 4646.4 |
| C5b1b  | 2609.6  | 2736.0 |
| C5c    | 6933.5  | 4137.6 |
| C5c1   | 3837.8  | 2409.6 |
| C5c1a  | 2554.3  | 1968.0 |
| C5d    | 12396.9 | 4992.0 |
| C5d1   | 2803.2  | 2726.4 |

|        |         |         |
|--------|---------|---------|
| C7     | 20628.6 | 4502.4  |
| C7a    | 17702.0 | 4406.4  |
| C7a1   | 12426.2 | 4195.2  |
| C7a1a  | 9056.6  | 4896.0  |
| C7a1a2 | 0.0     | 10012.8 |
| C7a1c  | 7495.6  | 4454.4  |
| Z      | 21661.6 | 8380.8  |
| Z1     | 15962.5 | 4819.2  |
| Z1a    | 6316.6  | 2851.2  |
| Z1a1   | 4634.1  | 2678.4  |
| Z1a1a  | 1049.1  | 1420.8  |
| Z1a2   | 4774.2  | 3062.4  |
| Z2     | 1576.6  | 2342.4  |
| Z3     | 15835.6 | 4396.8  |
| Z3a    | 9669.1  | 4204.8  |
| Z3a1   | 7509.8  | 4060.8  |
| Z3a1a  | 4074.8  | 3782.4  |
| Z3a2   | 1015.0  | 3955.2  |
| Z3b    | 5758.5  | 6576.0  |
| Z4     | 16665.5 | 4320.0  |
| Z4a    | 12477.5 | 4540.8  |
| Z7     | 1233.9  | 3264.0  |
| M9     | 38446.5 | 8390.4  |

|           |         |        |
|-----------|---------|--------|
| M9ab      | 27187.6 | 8131.2 |
| M9a       | 17852.6 | 3494.4 |
| M9a1      | 15567.2 | 2928.0 |
| M9a1a     | 13934.8 | 2812.8 |
| M9a1a1    | 12470.2 | 2678.4 |
| M9a1a1a   | 5772.6  | 4185.6 |
| M9a1a1b   | 7716.7  | 3484.8 |
| M9a1a1c   | 9164.5  | 3379.2 |
| M9a1a1c1  | 7367.3  | 3427.2 |
| M9a1a1c1a | 4221.4  | 3456.0 |
| M9a1a1c1b | 4019.0  | 4099.2 |
| M9a1a1d   | 8102.5  | 4176.0 |
| M9a1a2    | 6153.9  | 5443.2 |
| M9a1b     | 9416.6  | 3984.0 |
| M9a1b1    | 6557.4  | 2102.4 |
| M9a1b1a   | 5469.6  | 2179.2 |
| M9a1b1a1  | 2037.1  | 2352.0 |
| M9a1b1b   | 2305.8  | 2179.2 |
| M9a1b1c   | 4942.5  | 2812.8 |
| M9a1b2    | 3225.9  | 3494.4 |
| M9a4      | 14164.0 | 5539.2 |
| M9a4a     | 11840.7 | 4972.8 |
| M9a4a1    | 8604.0  | 4675.2 |

|        |         |        |
|--------|---------|--------|
| M9a5   | 7338.9  | 5241.6 |
| M9b    | 2699.5  | 2688.0 |
| E      | 23695.4 | 6902.4 |
| E1     | 11986.9 | 4732.8 |
| E1a    | 8647.1  | 3312.0 |
| E1a1   | 7623.9  | 3216.0 |
| E1a1a  | 6883.7  | 2428.8 |
| E1a1a1 | 5153.1  | 2947.2 |
| E1a1a2 | 4277.3  | 2313.6 |
| E1a2   | 5575.2  | 4406.4 |
| E1b    | 4935.5  | 2966.4 |
| E1b1   | 2761.7  | 2592.0 |
| E2     | 10131.7 | 4444.8 |
| E2a    | 8002.4  | 3945.6 |
| E2a1   | 5272.6  | 5107.2 |
| E2b    | 6635.4  | 5673.6 |
| E2b1   | 3935.4  | 3628.8 |
| M10    | 24493.8 | 7228.8 |
| M10a   | 15753.6 | 7804.8 |
| M10a1  | 9452.7  | 4012.8 |
| M10a1a | 4137.7  | 3072.0 |
| M10a2  | 9265.3  | 6518.4 |
| M11    | 20987.7 | 5740.8 |

|        |         |        |
|--------|---------|--------|
| M11ab  | 16209.0 | 4396.8 |
| M11a   | 11972.3 | 3523.2 |
| M11a1  | 8668.6  | 4041.6 |
| M11a2  | 8776.3  | 3715.2 |
| M11b   | 12962.0 | 4819.2 |
| M12G   | 47305.0 | 3552.0 |
| M12    | 31287.5 | 5731.2 |
| M12a   | 26020.6 | 5808.0 |
| M12a1a | 18690.7 | 6067.2 |
| G      | 31614.8 | 5193.6 |
| G1     | 21492.9 | 5414.4 |
| G1a    | 18139.1 | 5462.4 |
| G1a1   | 11257.1 | 4032.0 |
| G1a1a  | 5892.5  | 2188.8 |
| G1a1a1 | 2796.3  | 2476.8 |
| G1a1a2 | 3608.1  | 2678.4 |
| G1a1a3 | 2381.7  | 1852.8 |
| G1a1a4 | 2796.3  | 3283.2 |
| G1a3   | 6451.1  | 4521.6 |
| G1b    | 7246.3  | 5088.0 |
| G1c    | 12910.6 | 6009.6 |
| G2     | 26787.5 | 4617.6 |
| G2a    | 17145.5 | 5270.4 |



|         |         |        |
|---------|---------|--------|
| G2a1    | 14045.7 | 4742.4 |
| G2a1b   | 2181.8  | 3868.8 |
| G2a1c   | 4606.1  | 9638.4 |
| G2a1c1  | 4606.1  | 3753.6 |
| G2a1d   | 7303.3  | 3657.6 |
| G2a1e   | 2983.3  | 2985.6 |
| G2a5    | 1199.6  | 1670.4 |
| G2b     | 22776.4 | 5059.2 |
| G2b1    | 16830.4 | 5616.0 |
| G2b1a   | 13366.8 | 5443.2 |
| G2b1b   | 4662.1  | 4492.8 |
| G2b2    | 20476.0 | 5481.6 |
| G2b2a   | 15328.9 | 6057.6 |
| G3      | 23919.9 | 6931.2 |
| G3a     | 18932.9 | 6998.4 |
| G3a1    | 3754.2  | 3100.8 |
| G3a2    | 1240.7  | 9225.6 |
| G3b     | 13271.0 | 5568.0 |
| G3b1    | 10958.7 | 5500.8 |
| G4      | 9258.1  | 4732.8 |
| M134661 | 46675.2 | 3724.8 |
| M13     | 43169.4 | 4944.0 |
| M13a    | 19266.4 | 6720.0 |

|        |         |        |
|--------|---------|--------|
| M13a1  | 9539.2  | 6249.6 |
| M13a1a | 2685.6  | 2841.6 |
| M13a1b | 4277.3  | 3964.8 |
| M13a2  | 8726.0  | 4828.8 |
| M13b   | 31191.8 | 6873.6 |
| M13b1  | 22537.6 | 7123.2 |
| M13b2  | 5441.4  | 3888.0 |
| M46    | 1233.9  | 4550.4 |
| M61    | 5483.7  | 4310.4 |
| M14    | 41926.2 | 6172.8 |
| M17    | 43701.2 | 5193.6 |
| M17a   | 18849.6 | 6624.0 |
| M17c   | 40317.3 | 8880.0 |
| M21    | 45460.7 | 4617.6 |
| M21a   | 22822.7 | 7891.2 |
| M21cd  | 38561.0 | 6326.4 |
| M21c   | 6805.6  | 4857.6 |
| M21d   | 8217.0  | 6624.0 |
| M22    | 40646.6 | 5568.0 |
| M22a   | 29419.5 | 7891.2 |
| M22b   | 38282.9 | 5952.0 |
| M2375  | 47801.2 | 2697.6 |
| M23    | 5970.2  | 4464.0 |

|      |         |        |
|------|---------|--------|
| M75  | 28992.1 | 6499.2 |
| M26  | 2664.9  | 8140.8 |
| M27  | 45335.3 | 3494.4 |
| M27a | 2858.6  | 2371.2 |
| M27b | 973.9   | 1372.8 |
| M27c | 5533.0  | 6096.0 |
| M28  | 29023.7 | 6144.0 |
| M28a | 14193.6 | 5193.6 |
| M28b | 22276.0 | 6105.6 |
| M29Q | 46641.6 | 3830.4 |
| M29  | 13905.3 | 6316.8 |
| M29a | 1995.8  | 1968.0 |
| M29b | 7381.6  | 7526.4 |
| Q    | 37539.8 | 5635.2 |
| Q12  | 37539.8 | 8601.6 |
| Q1   | 18161.8 | 7344.0 |
| Q1a  | 15574.7 | 4828.8 |
| Q1b  | 14690.0 | 4924.8 |
| Q2   | 28731.3 | 7296.0 |
| Q2a  | 15306.6 | 5904.0 |
| Q3   | 31024.4 | 6038.4 |
| Q3a  | 26435.1 | 6316.8 |
| M31  | 35451.2 | 6451.2 |

|        |         |         |
|--------|---------|---------|
| M31a   | 29982.5 | 6729.6  |
| M31a1  | 5906.7  | 3964.8  |
| M31a1a | 0.0     | 9427.2  |
| M31a1b | 4158.6  | 3216.0  |
| M31a2  | 4879.4  | 4636.8  |
| M3256  | 43618.1 | 6614.4  |
| M32    | 38193.0 | 7814.4  |
| M32a   | 7452.8  | 5289.6  |
| M56    | 21393.3 | 11270.4 |
| M33    | 42331.8 | 9388.8  |
| M33a   | 29371.9 | 8217.6  |
| M33a1  | 29371.9 | 10790.4 |
| M33a1a | 6947.7  | 5529.6  |
| M33a1b | 7388.7  | 6172.8  |
| M33a2  | 15753.6 | 5856.0  |
| M33a2a | 6118.6  | 4224.0  |
| M33a3  | 23865.7 | 7843.2  |
| M33b   | 26991.4 | 6115.2  |
| M33b1  | 20209.1 | 5712.0  |
| M33c   | 12763.7 | 6950.4  |
| M33d   | 5167.2  | 3926.4  |
| M3457  | 44967.8 | 5011.2  |
| M34    | 26818.9 | 6787.2  |

|        |         |        |
|--------|---------|--------|
| M34a   | 17235.6 | 5913.6 |
| M34b   | 4760.2  | 4080.0 |
| M57    | 30220.7 | 8448.0 |
| M57a   | 22506.8 | 7776.0 |
| M57b   | 14920.0 | 6537.6 |
| M57b1  | 5561.1  | 4896.0 |
| M35    | 39085.2 | 9964.8 |
| M35a   | 16238.9 | 6249.6 |
| M35a1  | 11308.1 | 5030.4 |
| M35a1a | 5469.6  | 4060.8 |
| M35a2  | 12257.7 | 6422.4 |
| M35b   | 24470.5 | 6643.2 |
| M35b1  | 5012.7  | 5510.4 |
| M35b2  | 16373.5 | 6182.4 |
| M35c   | 16351.1 | 8188.8 |
| M36    | 32094.4 | 7017.6 |
| M36c   | 1343.5  | 9225.6 |
| M36d   | 20666.8 | 9129.6 |
| M36d1  | 1631.5  | 5913.6 |
| M3970  | 37605.1 | 7920.0 |
| M39    | 26638.7 | 5750.4 |
| M39a   | 12822.4 | 4905.6 |
| M39a1  | 9121.4  | 5040.0 |

|        |         |        |
|--------|---------|--------|
| M39a2  | 2526.7  | 3283.2 |
| M39b   | 16291.2 | 5548.8 |
| M39b1  | 11315.4 | 5500.8 |
| M39b2  | 12426.2 | 5875.2 |
| M70    | 1501.1  | 2400.0 |
| M4062  | 46473.9 | 3945.6 |
| M40    | 31511.0 | 7910.4 |
| M40a   | 13462.6 | 5587.2 |
| M40a1  | 9071.0  | 3532.8 |
| M40a1a | 4019.0  | 3254.4 |
| M40a1b | 4802.2  | 3561.6 |
| M62    | 22352.9 | 8256.0 |
| M62a   | 8991.9  | 5049.6 |
| M62b   | 20049.2 | 8169.6 |
| M41    | 10153.4 | 4137.6 |
| M41a   | 8059.6  | 5404.8 |
| M41b   | 7623.9  | 3907.2 |
| M41c   | 5068.8  | 3408.0 |
| M4274  | 49590.1 | 8064.0 |
| M42    | 47691.8 | 7958.4 |
| M42b   | 40259.7 | 6998.4 |
| M42b1  | 23912.2 | 6844.8 |
| M42b1a | 6976.1  | 6163.2 |

|       |         |        |
|-------|---------|--------|
| M74   | 35078.9 | 7152.0 |
| M74a  | 10189.6 | 6652.8 |
| M74b  | 25466.4 | 6374.4 |
| M74b1 | 2962.5  | 3014.4 |
| M44   | 8252.8  | 6931.2 |
| M44a  | 2361.0  | 1939.2 |
| M44a1 | 919.3   | 1228.8 |
| M49   | 30125.4 | 7305.6 |
| M49ab | 7040.0  | 4790.4 |
| M49c  | 21324.4 | 7852.8 |
| M49d  | 15165.3 | 6960.0 |
| M50   | 40811.5 | 6297.6 |
| M5258 | 42447.8 | 8131.2 |
| M52   | 34658.7 | 8083.2 |
| M52a  | 24423.9 | 7766.4 |
| M52a1 | 5047.8  | 6432.0 |
| M53   | 19904.6 | 7084.8 |
| M53b  | 9099.8  | 5337.6 |
| M60   | 33498.2 | 9292.8 |
| M60a  | 19236.1 | 8361.6 |
| M60b  | 1309.2  | 2361.6 |
| M71   | 35127.5 | 6537.6 |
| M71a  | 31606.8 | 6451.2 |

|       |         |        |
|-------|---------|--------|
| M71a1 | 18599.9 | 7497.6 |
| M71b  | 8927.2  | 5913.6 |
| M71c  | 6529.1  | 4896.0 |
| M72   | 13219.5 | 9763.2 |
| M7379 | 44642.4 | 4790.4 |
| M73   | 33192.8 | 6326.4 |
| M73a  | 23525.2 | 7027.2 |
| M73b  | 9987.0  | 6412.8 |
| M76   | 31104.1 | 7036.8 |
| M76a  | 1206.5  | 1920.0 |
| D     | 38434.1 | 4738.6 |
| D4    | 24579.9 | 1947.5 |
| D1    | 16792.3 | 2931.7 |
| D1a   | 15239.1 | 3473.1 |
| D1a1  | 3583.3  | 2882.5 |
| D1b   | 1504.1  | 2235.7 |
| D1c   | 3659.7  | 4119.9 |
| D1d   | 1368.6  | 1898.3 |
| D1e   | 8093.8  | 4675.3 |
| D1f   | 15217.3 | 3198.9 |
| D1f1  | 6825.6  | 4471.4 |
| D1g   | 11596.8 | 4401.1 |
| D4a   | 14994.1 | 3374.7 |



|          |         |        |
|----------|---------|--------|
| D4a1     | 7863.5  | 2242.7 |
| D4a1a    | 5505.3  | 2847.4 |
| D4a1a1   | 3914.7  | 2636.5 |
| D4a1b    | 5211.6  | 3051.3 |
| D4a1b1   | 2583.1  | 5835.4 |
| D4a1c    | 3283.0  | 3923.1 |
| D4a1d    | 3283.0  | 3733.2 |
| D4a1e    | 4774.7  | 3220.0 |
| D4a1f    | 5206.5  | 2896.6 |
| D4a2     | 8245.8  | 4239.4 |
| D4a2a    | 1208.1  | 1666.2 |
| D4a3     | 12991.5 | 3409.8 |
| D4a3a    | 11746.5 | 3852.7 |
| D4a3b    | 11287.1 | 3634.8 |
| D4b      | 23529.9 | 2137.3 |
| D4b1     | 18944.6 | 2748.9 |
| D4b1a    | 17595.4 | 3030.2 |
| D4b1a1   | 5722.0  | 2896.6 |
| D4b1a1a  | 2745.1  | 3269.2 |
| D4b1a2   | 13773.8 | 3452.0 |
| D4b1a2a  | 10754.4 | 3613.7 |
| D4b1a2a1 | 7989.1  | 4007.4 |
| D4b1a2a2 | 3054.4  | 4134.0 |

|          |         |        |
|----------|---------|--------|
| D4b1b    | 12212.4 | 3796.5 |
| D4b1b1   | 7936.7  | 4042.6 |
| D4b1b1a  | 2320.2  | 2622.4 |
| D4b1b1a1 | 907.6   | 1371.0 |
| D4b1b2   | 9382.1  | 4070.7 |
| D4b1c    | 11719.8 | 4471.4 |
| D3       | 1268.2  | 1975.6 |
| D4b2     | 16567.3 | 2692.7 |
| D4b2a    | 14434.6 | 3100.5 |
| D4b2a1   | 1579.5  | 2193.5 |
| D4b2a2   | 8960.4  | 3691.0 |
| D4b2a2a  | 3817.7  | 3093.4 |
| D4b2a2b  | 3486.5  | 3944.1 |
| D4b2b    | 12932.3 | 2805.2 |
| D4b2b1   | 7623.0  | 3234.1 |
| D4b2b1a  | 5975.2  | 3030.2 |
| D4b2b1b  | 1393.7  | 1898.3 |
| D4b2b2   | 9836.6  | 4281.6 |
| D4b2b3   | 3608.7  | 2706.8 |
| D4b2b4   | 10318.8 | 3522.3 |
| D4b2b5   | 11009.9 | 3480.1 |
| D4b2d    | 1358.5  | 2348.2 |
| D4c      | 20883.7 | 4098.8 |

|         |         |        |
|---------|---------|--------|
| D4c1    | 15833.8 | 5012.8 |
| D4c1a   | 4211.1  | 2741.9 |
| D4c1a1  | 2229.3  | 2249.8 |
| D4c1b   | 7080.6  | 3965.2 |
| D4c1b1  | 2745.1  | 3367.6 |
| D4c2    | 12276.7 | 4429.3 |
| D4c2a   | 1168.0  | 1624.1 |
| D4c2b   | 7435.0  | 4626.1 |
| D4c2c   | 3924.9  | 4830.0 |
| D4e     | 18606.4 | 3585.6 |
| D4e13   | 16457.7 | 3459.0 |
| D4e1    | 15043.1 | 3283.3 |
| D4e1a   | 8886.7  | 3037.2 |
| D4e1a1  | 3222.0  | 2692.7 |
| D4e1a2  | 7461.1  | 3072.4 |
| D4e1a2a | 2083.0  | 2130.3 |
| D2      | 12003.4 | 3311.4 |
| D2ab    | 9181.6  | 3051.3 |
| D2a     | 5587.8  | 2439.6 |
| D2a1    | 4467.0  | 2299.0 |
| D2a1a   | 2897.1  | 2341.2 |
| D2a1b   | 1022.7  | 1462.4 |
| D2a2    | 2704.6  | 2362.3 |

|        |         |        |
|--------|---------|--------|
| D2b    | 6716.5  | 2952.8 |
| D2b1   | 4032.2  | 2474.8 |
| D2b1a  | 2158.6  | 2432.6 |
| D2b2   | 2340.4  | 2798.2 |
| D4e2   | 5866.7  | 2910.7 |
| D4e2a  | 2785.6  | 3128.6 |
| D4e2b  | 3598.5  | 3220.0 |
| D4e2c  | 2785.6  | 2474.8 |
| D4e4   | 9334.6  | 3937.1 |
| D4e4a  | 7335.9  | 3852.7 |
| D4e4a1 | 1127.9  | 1567.8 |
| D4e4b  | 1534.3  | 2095.1 |
| D4e5   | 10239.2 | 4619.1 |
| D4f    | 17827.0 | 6278.3 |
| D4f1   | 4303.2  | 4021.5 |
| D4g    | 22879.6 | 2608.3 |
| D4g1   | 5975.2  | 2566.2 |
| D4g1a  | 2876.9  | 2284.9 |
| D4g1b  | 2168.7  | 2559.1 |
| D4g1c  | 3649.5  | 3030.2 |
| D4g2   | 19800.5 | 3227.0 |
| D4g2a  | 16699.0 | 3979.3 |
| D4g2a1 | 13093.8 | 4949.5 |

|          |         |         |
|----------|---------|---------|
| D4g2a1a  | 3394.9  | 3543.4  |
| D4g2b    | 17132.9 | 4126.9  |
| D4h      | 21500.2 | 2376.3  |
| D4h1     | 17320.0 | 4738.6  |
| D4h1a    | 8650.0  | 6369.7  |
| D4h1a1   | 1479.0  | 2067.0  |
| D4h1a2   | 0.0     | 8823.4  |
| D4h1b    | 6872.4  | 6123.6  |
| D4h3     | 18257.8 | 2917.7  |
| D4h3a    | 12953.8 | 2580.2  |
| D4h3a1   | 10478.0 | 2812.2  |
| D4h3a1a  | 6721.7  | 3234.1  |
| D4h3a1a1 | 3135.7  | 2770.0  |
| D4h3a1a2 | 3970.9  | 2981.0  |
| D4h3a2   | 10361.2 | 3775.4  |
| D4h3a3   | 12953.8 | 5631.5  |
| D4h3a3a  | 9847.2  | 5019.8  |
| D4h3a4   | 1509.2  | 2102.1  |
| D4h3a5   | 11436.6 | 2945.8  |
| D4h4     | 18152.8 | 4337.9  |
| D4h4a    | 7012.9  | 4387.1  |
| D4i      | 12303.6 | 12662.0 |
| D4i1     | 5732.3  | 5012.8  |

|        |         |         |
|--------|---------|---------|
| D4i2   | 5577.5  | 13772.9 |
| D4j    | 13395.7 | 2439.6  |
| D4j1   | 12292.8 | 2587.2  |
| D4j1a  | 5330.0  | 3044.2  |
| D4j1a1 | 2002.3  | 2418.5  |
| D4j1b  | 9456.0  | 3002.0  |
| D4j1b2 | 3950.4  | 3437.9  |
| D4j2   | 3547.6  | 2995.0  |
| D4j2a  | 1956.9  | 2418.5  |
| D4j3   | 10233.9 | 3255.1  |
| D4j3a  | 8439.9  | 3360.6  |
| D4j11  | 5572.3  | 3536.4  |
| D4j4   | 2958.0  | 3873.8  |
| D4j4a  | 1077.8  | 2045.9  |
| D4j5   | 4651.5  | 3564.5  |
| D4j6   | 6027.0  | 4225.4  |
| D4j7   | 5742.7  | 3712.1  |
| D4j7a  | 1193.0  | 2657.6  |
| D4j8   | 4032.2  | 4998.7  |
| D4j9   | 2083.0  | 2875.5  |
| D4j10  | 2083.0  | 3459.0  |
| D4k    | 5381.6  | 5779.1  |
| D4o    | 13844.1 | 4591.0  |

|       |         |        |
|-------|---------|--------|
| D4o1  | 7132.7  | 3480.1 |
| D4o1a | 4836.3  | 3044.2 |
| D4o2  | 2963.1  | 2854.4 |
| D4p   | 3710.7  | 3578.6 |
| D4l   | 16962.5 | 4844.1 |
| D4l1  | 13563.1 | 4984.7 |
| D4l1a | 7304.6  | 5139.3 |
| D4l2  | 13952.3 | 5097.2 |
| D4m   | 19438.8 | 4126.9 |
| D4m1  | 3782.0  | 2952.8 |
| D4m2  | 8949.8  | 5188.6 |
| D4n   | 8434.6  | 5413.5 |
| D4n1  | 2805.9  | 3058.3 |
| D4n1a | 1042.7  | 1469.4 |
| D4q   | 9281.8  | 5870.5 |
| D4q1  | 5453.7  | 3761.4 |
| D4q1a | 1157.9  | 1771.7 |
| D4s   | 13568.5 | 5821.3 |
| D5    | 30731.6 | 4717.5 |
| D5ab  | 28716.4 | 4647.2 |
| D5a   | 19761.6 | 4942.5 |
| D5a1  | 7163.9  | 3093.4 |
| D5a1a | 5722.0  | 2741.9 |

|          |         |        |
|----------|---------|--------|
| D5a1a1   | 4379.9  | 2643.5 |
| D5a1a2   | 2745.1  | 2657.6 |
| D5a2     | 13395.7 | 7157.1 |
| D5a2a    | 11543.4 | 3887.9 |
| D5a2a1   | 9181.6  | 3227.0 |
| D5a2a1a  | 3955.6  | 2144.3 |
| D5a2a1a1 | 2618.5  | 2031.8 |
| D5a2a1a2 | 1298.3  | 3002.0 |
| D5a2a1b  | 4836.3  | 3894.9 |
| D5a2a2   | 1941.8  | 2741.9 |
| D5a3     | 16079.8 | 6144.7 |
| D5a3a    | 1338.5  | 8043.0 |
| D5b      | 18916.8 | 4569.9 |
| D5b1     | 15233.7 | 4176.2 |
| D5b1a    | 8676.3  | 5891.6 |
| D5b1a1   | 3430.5  | 4373.0 |
| D5b1b    | 8797.2  | 4141.0 |
| D5b1b1   | 2315.1  | 2214.6 |
| D5b1c    | 13773.8 | 4239.4 |
| D5c      | 17061.5 | 6060.3 |
| D5c1     | 3257.6  | 5139.3 |
| D6       | 23354.4 | 6440.0 |
| D6a      | 20486.7 | 6826.7 |



|         |         |        |
|---------|---------|--------|
| D6a1    | 3018.9  | 4035.5 |
| D6c     | 10584.3 | 5315.1 |
| N       | 58859.9 | 2352.3 |
| N15     | 56547.0 | 4704.7 |
| N1      | 51642.7 | 5640.3 |
| N1acdeI | 45169.0 | 6593.5 |
| N1adeI  | 42531.4 | 6576.0 |
| N1aeI   | 38555.4 | 6383.6 |
| N1a     | 18117.5 | 5246.8 |
| N1a1    | 16501.9 | 4967.0 |
| N1a1a   | 13893.9 | 4634.7 |
| N1a1a1  | 5736.8  | 3244.3 |
| N1a1a1a | 3662.9  | 2518.5 |
| N1a1a2  | 1385.5  | 3567.8 |
| N1eI    | 28880.7 | 6095.1 |
| I       | 20856.6 | 3594.1 |
| I1      | 15230.8 | 3401.7 |
| I1a     | 11726.2 | 3305.5 |
| I1a1    | 5294.2  | 2133.7 |
| I1a1a   | 3327.3  | 2719.6 |
| I1a1b   | 2608.0  | 2973.2 |
| I1a1c   | 1522.9  | 3384.2 |
| I1a1d   | 1892.0  | 1862.6 |

|       |         |        |
|-------|---------|--------|
| I1b   | 11135.2 | 4818.3 |
| I1c   | 8215.6  | 3786.5 |
| I23   | 11307.6 | 4153.7 |
| I2    | 6386.9  | 2448.5 |
| I2a   | 3770.7  | 2142.5 |
| I2a1  | 2986.1  | 1967.6 |
| I2b   | 1266.9  | 4538.5 |
| I2c   | 2268.4  | 2693.4 |
| I2d   | 3827.8  | 3795.2 |
| I2e   | 2935.6  | 3454.2 |
| I3    | 8679.2  | 3410.4 |
| I3a   | 6090.5  | 3261.8 |
| I3a1  | 5070.2  | 3016.9 |
| I3b   | 5595.6  | 3629.1 |
| I4    | 14912.6 | 5955.1 |
| I4a   | 2124.0  | 6112.6 |
| I5    | 18805.9 | 4005.1 |
| I5a   | 15115.7 | 4127.5 |
| I5a1  | 11062.3 | 4660.9 |
| N1c   | 8731.5  | 5963.9 |
| N1b   | 19517.3 | 4800.8 |
| N1b1  | 14183.4 | 3148.1 |
| N1b1a | 8986.8  | 4739.6 |

|        |         |        |
|--------|---------|--------|
| N1b1b  | 11599.9 | 3235.5 |
| N1b1b1 | 9728.5  | 3664.0 |
| N1b1b2 | 4228.1  | 2877.0 |
| N1b1c  | 11155.1 | 4180.0 |
| N1b1d  | 8437.5  | 3629.1 |
| N1b1e  | 5903.9  | 5509.2 |
| N1b2   | 1185.8  | 2037.5 |
| N5     | 36712.4 | 8202.5 |
| N5a    | 6122.7  | 4249.9 |
| N2     | 44477.3 | 7363.0 |
| N2a    | 23573.8 | 7914.0 |
| W      | 17589.0 | 3375.5 |
| W1     | 10453.6 | 2763.3 |
| W1a    | 3011.4  | 2912.0 |
| W1b    | 2853.7  | 2282.4 |
| W1b1   | 1635.4  | 2002.5 |
| W1c    | 7798.8  | 3401.7 |
| W1c1   | 2942.0  | 2632.2 |
| W1e    | 1604.2  | 2798.3 |
| W1f    | 7188.5  | 3838.9 |
| W1g    | 1961.0  | 2745.8 |
| W3     | 14419.5 | 2640.9 |
| W3a    | 12726.6 | 2544.7 |

|         |         |        |
|---------|---------|--------|
| W3a1    | 11486.9 | 2422.3 |
| W3a1a   | 10539.5 | 2474.8 |
| W3a1a1  | 9603.6  | 2614.7 |
| W3a1b   | 3194.5  | 4416.1 |
| W3a1c   | 9347.4  | 3183.1 |
| W3a2    | 5942.5  | 5106.9 |
| W3b     | 9078.5  | 3943.9 |
| W3b1    | 1516.6  | 2098.7 |
| W4      | 11407.2 | 4311.1 |
| W4a     | 9590.4  | 4311.1 |
| W5      | 11075.5 | 3725.2 |
| W5a     | 7052.5  | 3025.7 |
| W5a1    | 4189.9  | 2238.6 |
| W5a1a1  | 3188.2  | 2002.5 |
| W5a1a1a | 806.1   | 1093.1 |
| W5b     | 7486.9  | 4022.6 |
| W6      | 10770.9 | 3594.1 |
| W6a     | 6444.9  | 4171.2 |
| W6b     | 7208.0  | 3742.7 |
| W6c     | 8287.4  | 3436.7 |
| W7      | 9373.7  | 5745.3 |
| N3      | 6109.8  | 4459.8 |
| N9      | 45709.7 | 7931.5 |

|        |         |        |
|--------|---------|--------|
| N9a    | 17520.4 | 4389.8 |
| N9a13  | 15007.4 | 6060.1 |
| N9a1   | 5730.4  | 3113.1 |
| N9a1a  | 4380.9  | 2920.7 |
| N9a3   | 8280.9  | 5124.4 |
| N9a245 | 15305.4 | 4022.6 |
| N9a2   | 10361.1 | 3419.2 |
| N9a2ab | 7961.5  | 3550.4 |
| N9a2a  | 2986.1  | 3069.4 |
| N9a2b  | 6206.4  | 4145.0 |
| N9a2c  | 3567.8  | 3165.6 |
| N9a2d  | 5140.6  | 4389.8 |
| N9a4   | 5653.3  | 4118.8 |
| N9a5   | 6851.9  | 3917.6 |
| N9a6   | 11972.5 | 5491.7 |
| N9a10  | 12245.8 | 5937.7 |
| N9b    | 14885.6 | 4092.5 |
| N9b1   | 11859.3 | 3760.2 |
| N9b1a  | 10645.2 | 3690.3 |
| N9b1b  | 2746.5  | 2947.0 |
| N9b1c  | 6987.8  | 4967.0 |
| N9b1c1 | 5762.5  | 3786.5 |
| N9b2   | 13369.7 | 4110.0 |

|       |         |        |
|-------|---------|--------|
| N9b3  | 7629.8  | 6007.6 |
| Y     | 24576.4 | 7083.2 |
| Y1    | 14689.5 | 5264.3 |
| Y1a   | 7467.5  | 5526.7 |
| Y1b   | 9222.8  | 4967.0 |
| Y2    | 7279.3  | 2894.5 |
| Y2a   | 4929.5  | 2789.6 |
| Y2a1  | 2488.4  | 2658.4 |
| Y2b   | 1741.8  | 3454.2 |
| N10   | 50443.7 | 6514.8 |
| N10a  | 21756.4 | 6611.0 |
| N11   | 56272.5 | 3559.1 |
| N11a  | 16706.6 | 6532.3 |
| N11a1 | 8072.3  | 4748.4 |
| N11b  | 6748.4  | 4591.0 |
| N21   | 22351.3 | 9024.5 |
| N22   | 25157.3 | 8823.4 |
| A     | 24208.8 | 4905.8 |
| A3    | 6774.3  | 4573.5 |
| A4    | 20807.9 | 3253.0 |
| A4a   | 12987.6 | 5404.2 |
| A4a1  | 7240.4  | 3524.1 |
| A4a1a | 4891.2  | 3436.7 |

|      |         |        |
|------|---------|--------|
| A4b  | 12907.3 | 5150.6 |
| A4c  | 12032.4 | 4669.7 |
| A4d  | 7733.8  | 4302.4 |
| A2   | 15644.6 | 1757.7 |
| A2a  | 4629.4  | 4092.5 |
| A2a2 | 0.0     | 7634.1 |
| A2b  | 5936.1  | 6252.5 |
| A2b1 | 2809.5  | 3218.1 |
| A2d  | 10850.3 | 3891.4 |
| A2d1 | 3669.2  | 3602.8 |
| A2d2 | 7383.1  | 4451.1 |
| A2f  | 949.1   | 1337.9 |
| A2g  | 4164.5  | 3069.4 |
| A2i  | 14089.1 | 2378.6 |
| A2i1 | 2004.9  | 1923.8 |
| A2j  | 4923.1  | 3069.4 |
| A2j1 | 3137.7  | 2684.6 |
| A2k  | 12432.6 | 3314.2 |
| A2k1 | 6981.3  | 5937.7 |
| A2n  | 11188.2 | 3016.9 |
| A2r  | 9439.3  | 4040.1 |
| A2s  | 7610.3  | 4844.6 |
| A2t  | 9603.6  | 3646.5 |

|         |         |         |
|---------|---------|---------|
| A2v     | 8613.9  | 4862.1  |
| A2w     | 8359.2  | 3970.1  |
| A2x     | 13631.6 | 2457.3  |
| A2y     | 5025.4  | 3427.9  |
| A2q     | 13021.1 | 5002.0  |
| A2u     | 7792.3  | 4958.3  |
| A2z     | 1117.3  | 1547.8  |
| A6      | 11088.8 | 4774.6  |
| A7      | 0.0     | 15749.2 |
| A11     | 17349.2 | 4538.5  |
| A11a    | 6039.0  | 4678.4  |
| A11b    | 10262.1 | 5605.4  |
| A5      | 16938.8 | 4757.1  |
| A5a     | 8026.7  | 2396.1  |
| A5a1    | 7078.4  | 2186.2  |
| A5a1a   | 6077.6  | 2002.5  |
| A5a1a1  | 3599.5  | 1626.5  |
| A5a1a1a | 2419.2  | 1679.0  |
| A5a1a1b | 2419.2  | 1635.3  |
| A5a1a2  | 4623.1  | 2404.8  |
| A5a1b   | 4801.8  | 2912.0  |
| A5a2    | 1804.4  | 2457.3  |
| A5b     | 8163.5  | 4215.0  |



|         |         |         |
|---------|---------|---------|
| A5c     | 3238.8  | 3191.8  |
| A8      | 18303.1 | 6925.8  |
| A10     | 7779.3  | 4494.8  |
| O       | 52053.6 | 6392.4  |
| O1      | 16706.6 | 7966.4  |
| S       | 53483.4 | 5526.7  |
| S2      | 38659.8 | 9024.5  |
| S3      | 2168.0  | 2142.5  |
| X       | 31718.5 | 11709.2 |
| X1      | 19724.9 | 5211.8  |
| X1a     | 11161.7 | 4538.5  |
| X1c     | 14385.7 | 5343.0  |
| X3      | 8091.8  | 6042.6  |
| X3a     | 1030.1  | 5159.4  |
| X2      | 19233.8 | 2640.9  |
| X2aj    | 17075.5 | 3095.6  |
| X2a     | 12726.6 | 3497.9  |
| X2a1    | 7883.4  | 2605.9  |
| X2a1a   | 7071.9  | 2667.1  |
| X2a1a1  | 3688.3  | 2098.7  |
| X2a1b   | 4336.3  | 2378.6  |
| X2a1b1  | 2645.7  | 2020.0  |
| X2a1b1a | 998.9   | 1320.5  |

|       |         |        |
|-------|---------|--------|
| X2a1c | 3618.5  | 2789.6 |
| X2a2  | 4495.6  | 3349.2 |
| X2bd  | 16583.7 | 3497.9 |
| X2b   | 9675.9  | 2466.0 |
| X2b1  | 4463.7  | 2763.3 |
| X2b4  | 5589.2  | 2597.2 |
| X2b4a | 4521.0  | 2509.7 |
| X2b5  | 1466.7  | 2063.8 |
| X2b6  | 3365.3  | 2273.6 |
| X2b7  | 6554.7  | 3917.6 |
| X2d   | 10870.2 | 3497.9 |
| X2d1  | 5319.9  | 3314.2 |
| X2d2  | 7389.6  | 4171.2 |
| X2c   | 9505.0  | 4232.4 |
| X2c1  | 6722.6  | 2544.7 |
| X2c1a | 1691.7  | 2492.2 |
| X2c1b | 3739.0  | 2317.3 |
| X2c1c | 3017.7  | 3908.9 |
| X2m   | 14223.9 | 5552.9 |
| X2m1  | 9629.9  | 4940.8 |
| X2m2  | 4444.6  | 3655.3 |
| X2e   | 13457.0 | 5133.1 |
| X2e1  | 10665.1 | 6838.4 |

|         |         |         |
|---------|---------|---------|
| X2e2    | 9748.2  | 5150.6  |
| X2e2a   | 6051.9  | 5150.6  |
| X2h     | 1723.0  | 3183.1  |
| X2f     | 13967.9 | 6602.3  |
| X2i     | 12940.8 | 6331.2  |
| X2k     | 8385.3  | 6418.6  |
| X4      | 9820.6  | 5622.9  |
| R       | 56523.5 | 2081.2  |
| R0      | 39960.0 | 11097.0 |
| R0ab    | 22428.3 | 6156.3  |
| R0a1    | 20766.1 | 5754.0  |
| R0a1a   | 12639.7 | 3218.1  |
| R0a1a1  | 8941.0  | 4591.0  |
| R0a1a1a | 1873.3  | 3148.1  |
| R0a1a2  | 2683.5  | 2238.6  |
| R0a1a3  | 4476.4  | 2894.5  |
| R0a1a4  | 6651.5  | 4031.3  |
| R0a1b   | 1435.4  | 2037.5  |
| R0a23   | 17527.3 | 4022.6  |
| R0a2    | 14149.8 | 2387.3  |
| R0a2a   | 8718.5  | 4643.4  |
| R0a2a1  | 1860.7  | 2536.0  |
| R0a2b   | 2992.4  | 5115.7  |

|         |         |        |
|---------|---------|--------|
| R0a2c   | 10546.1 | 6060.1 |
| R0a2d   | 7935.5  | 4206.2 |
| R0a2f   | 12626.3 | 3323.0 |
| R0a2f1  | 3802.4  | 3384.2 |
| R0a2f1a | 1266.9  | 4853.3 |
| R0a2f1b | 2061.3  | 2789.6 |
| R0a2g   | 7461.0  | 5789.0 |
| R0a2h   | 8209.1  | 5762.8 |
| R0a2i   | 2664.6  | 2798.3 |
| R0a2j   | 9833.8  | 3970.1 |
| R0a2k   | 2689.8  | 2081.2 |
| R0a2l   | 4916.7  | 4057.5 |
| R0a2m   | 4088.2  | 5631.6 |
| R0a3    | 13806.4 | 4862.1 |
| R0a4    | 1835.7  | 2562.2 |
| HV      | 21905.8 | 2832.7 |
| HV0     | 13527.5 | 3229.0 |
| HV0a    | 11197.4 | 2084.2 |
| HV0a1   | 5105.4  | 3140.9 |
| HV0a1a  | 895.3   | 1254.9 |
| V       | 9739.5  | 1357.6 |
| V1      | 8474.4  | 1937.4 |
| V1a     | 6941.4  | 2531.8 |

|       |        |        |
|-------|--------|--------|
| V1a1  | 5508.6 | 2164.9 |
| V1a1a | 2681.4 | 3764.7 |
| V1a1b | 4451.8 | 2128.2 |
| V1b   | 6561.7 | 2707.9 |
| V2    | 8003.8 | 2076.8 |
| V2a   | 5664.8 | 2774.0 |
| V2a1  | 2528.3 | 2568.5 |
| V2a1a | 968.4  | 1328.3 |
| V2b   | 3529.5 | 2818.0 |
| V2b1  | 1214.1 | 3493.2 |
| V2c   | 6237.0 | 2553.8 |
| V3    | 6838.3 | 2370.4 |
| V3a   | 4965.9 | 2590.5 |
| V3a1  | 3582.6 | 2319.0 |
| V3b   | 2369.9 | 2164.9 |
| V3c   | 4019.3 | 3096.9 |
| V4    | 6053.2 | 3434.5 |
| V5    | 2903.6 | 4139.0 |
| V6    | 4992.7 | 4021.6 |
| V7    | 8167.8 | 2172.2 |
| V7a   | 6026.2 | 2414.4 |
| V7a1  | 1612.4 | 2150.2 |
| V7b   | 1917.0 | 1820.0 |

|      |        |        |
|------|--------|--------|
| V8   | 2903.6 | 3449.1 |
| V9   | 7829.0 | 2722.6 |
| V9a  | 4451.8 | 2590.5 |
| V9a1 | 2275.0 | 2069.5 |
| V10  | 7175.1 | 3441.8 |
| V10a | 1350.2 | 2627.2 |
| V10b | 4853.3 | 4234.4 |
| V11  | 4024.6 | 2935.4 |
| V12  | 3609.2 | 3412.4 |
| V13  | 1559.9 | 2164.9 |
| V14  | 4992.7 | 4006.9 |
| V15  | 6475.1 | 3273.0 |
| V15a | 3864.7 | 2994.1 |
| V16  | 1922.3 | 2619.9 |
| V17  | 5643.3 | 2862.1 |
| V18  | 6816.6 | 3280.4 |
| V19  | 2903.6 | 3933.5 |
| V20  | 5030.3 | 3177.6 |
| V21  | 1167.0 | 7470.7 |
| HV0b | 5336.5 | 3140.9 |
| HV0c | 3333.0 | 3170.3 |
| HV0d | 5336.5 | 3397.8 |
| HV0e | 3030.7 | 3229.0 |

|        |         |         |
|--------|---------|---------|
| HV0f   | 3588.0  | 2685.9  |
| HV1    | 16829.9 | 2979.5  |
| HV1a   | 14981.4 | 3412.4  |
| HV1a1  | 8255.3  | 4036.2  |
| HV1a1a | 2649.7  | 3214.3  |
| HV1a2  | 12857.9 | 3816.1  |
| HV1b   | 14805.5 | 3691.3  |
| HV1b2  | 1512.7  | 4293.1  |
| HV1b3  | 10613.9 | 4410.5  |
| HV1c   | 12723.2 | 5151.7  |
| HV2    | 11036.1 | 3581.2  |
| HV2a   | 4783.6  | 2950.1  |
| HV4    | 15823.7 | 4469.2  |
| HV4a   | 15823.7 | 7588.1  |
| HV4a1  | 9723.0  | 5731.4  |
| HV4a2  | 9728.5  | 5577.3  |
| HV4b   | 12000.6 | 4616.0  |
| HV5    | 2017.0  | 14537.8 |
| HV6    | 5718.7  | 3008.8  |
| HV6a   | 1481.2  | 1467.7  |
| HV7    | 4740.8  | 3786.7  |
| HV8    | 2011.7  | 2774.0  |
| HV9    | 8096.7  | 4718.7  |

|        |         |        |
|--------|---------|--------|
| HV9a   | 5175.3  | 2693.3 |
| HV9a1  | 3593.3  | 2451.1 |
| HV10   | 2011.7  | 8608.2 |
| HV11   | 9392.1  | 5944.3 |
| HV11a  | 4799.7  | 4505.9 |
| HV14   | 6366.8  | 3904.1 |
| HV15   | 8107.6  | 3375.8 |
| HV16   | 7670.7  | 3896.8 |
| HV12   | 19361.5 | 3838.1 |
| HV12a  | 15447.7 | 5724.1 |
| HV12b  | 11091.7 | 5621.4 |
| HV13   | 18735.9 | 4549.9 |
| H      | 12846.0 | 773.4  |
| H1     | 9888.6  | 880.6  |
| H1a    | 6307.3  | 1820.0 |
| H1a1   | 4099.3  | 1959.4 |
| H1a1a  | 3274.6  | 1790.6 |
| H1a1a1 | 1156.6  | 1731.9 |
| H1a1b  | 1324.1  | 1827.3 |
| H1a2   | 2908.9  | 2634.6 |
| H1a3   | 4960.5  | 1805.3 |
| H1a3a  | 3859.4  | 1621.8 |
| H1a3a1 | 1276.9  | 1658.5 |



|        |        |        |
|--------|--------|--------|
| H1a3a2 | 2586.3 | 4036.2 |
| H1a3b  | 3157.9 | 2062.1 |
| H1a3c  | 2501.9 | 2781.3 |
| H1a4   | 1643.9 | 2186.9 |
| H1a5   | 1261.2 | 1680.5 |
| H1a6   | 1031.1 | 1423.7 |
| H1b    | 6237.0 | 1805.3 |
| H1b1   | 4955.2 | 1761.3 |
| H1b1a  | 2834.8 | 1658.5 |
| H1b1b  | 921.4  | 3214.3 |
| H1b1c  | 2069.6 | 1709.9 |
| H1b1h  | 1271.7 | 1629.2 |
| H1b1e  | 1470.8 | 2010.8 |
| H1b1f  | 1093.8 | 1489.7 |
| H1b2   | 3662.4 | 2774.0 |
| H1b2a  | 707.4  | 4065.6 |
| H1b2a1 | 0.0    | 4190.3 |
| H1b3   | 4339.5 | 2847.4 |
| H1b4   | 1638.6 | 4792.1 |
| H1f    | 3673.1 | 3625.3 |
| H1f1   | 1449.8 | 1915.4 |
| H1f1a  | 1449.8 | 2216.3 |
| H1g    | 4692.6 | 2928.1 |

|        |        |        |
|--------|--------|--------|
| H1g1   | 1428.8 | 1900.7 |
| H1k    | 2612.8 | 1996.1 |
| H1k1a  | 989.3  | 1306.3 |
| H1y    | 1775.1 | 2671.3 |
| H1z    | 4655.1 | 2862.1 |
| H1ab   | 4697.9 | 3148.3 |
| H1ab1  | 1428.8 | 2084.2 |
| H1ad   | 1775.1 | 2392.4 |
| H1c    | 6448.0 | 1210.9 |
| H1c1   | 3518.9 | 1607.2 |
| H1c1a  | 1208.9 | 1585.1 |
| H1c1b  | 2628.6 | 1519.1 |
| H1c2   | 4109.9 | 2275.0 |
| H1c2a  | 2707.9 | 1996.1 |
| H1c3   | 4532.0 | 1856.7 |
| H1c3a  | 1449.8 | 1372.3 |
| H1c3b  | 1031.1 | 1482.4 |
| H1c4   | 4494.5 | 2597.9 |
| H1c4a  | 1025.9 | 1387.0 |
| H1c4b  | 3073.1 | 1893.4 |
| H1c4b1 | 1109.5 | 1438.4 |
| H1c5   | 3248.0 | 4916.9 |
| H1c5a  | 1827.7 | 2040.1 |

|        |        |         |
|--------|--------|---------|
| H1c6   | 1664.9 | 2208.9  |
| H1c7   | 1664.9 | 2260.3  |
| H1c8   | 3041.3 | 2942.8  |
| H1c9   | 2914.2 | 1959.4  |
| H1c9a  | 1670.1 | 1511.8  |
| H1c11  | 1659.6 | 2260.3  |
| H1c12  | 1664.9 | 2208.9  |
| H1c13  | 2951.2 | 3192.3  |
| H1c15  | 2586.3 | 31856.9 |
| H1c16  | 3859.4 | 2678.6  |
| H1c17  | 1659.6 | 2223.6  |
| H1c19  | 1664.9 | 2495.1  |
| H1c20  | 4457.1 | 2164.9  |
| H1e    | 8501.8 | 2025.5  |
| H1e1   | 7229.5 | 1878.7  |
| H1e1a  | 6193.7 | 1878.7  |
| H1e1a1 | 863.9  | 3214.3  |
| H1e1a3 | 3742.2 | 3463.8  |
| H1e1a4 | 754.4  | 1372.3  |
| H1e1b  | 4772.9 | 2539.2  |
| H1e1b1 | 3062.5 | 2164.9  |
| H1e2   | 3508.2 | 2157.5  |
| H1e2a  | 1938.1 | 1783.3  |

|        |        |        |
|--------|--------|--------|
| H1e2b  | 1208.9 | 1577.8 |
| H1e3   | 1041.5 | 1665.9 |
| H1e4   | 2739.6 | 7147.8 |
| H1e4a  | 1025.9 | 7375.3 |
| H1e5   | 6231.6 | 2487.8 |
| H1h    | 7616.2 | 2788.7 |
| H1h1   | 4318.1 | 3852.8 |
| H1i    | 5675.6 | 2230.9 |
| H1i1   | 2734.3 | 2678.6 |
| H1i2   | 3593.3 | 2128.2 |
| H1i2a  | 1224.6 | 1864.0 |
| H1an   | 5831.9 | 2509.8 |
| H1an1  | 3870.0 | 2407.1 |
| H1an1a | 1282.2 | 1687.9 |
| H1bb   | 4243.4 | 3522.5 |
| H1j    | 7774.4 | 1864.0 |
| H1j1   | 4596.2 | 2010.8 |
| H1j1a  | 2924.8 | 1761.3 |
| H1j1a1 | 1072.9 | 2876.7 |
| H1j1a2 | 1072.9 | 1416.4 |
| H1j1b  | 1413.1 | 1864.0 |
| H1j1c  | 1796.1 | 1673.2 |
| H1j2   | 3577.3 | 2531.8 |

|        |        |        |
|--------|--------|--------|
| Hlj3   | 1785.6 | 2407.1 |
| Hlj4   | 3264.0 | 4674.7 |
| Hlj5   | 2559.9 | 2304.3 |
| Hlj8   | 4730.0 | 2862.1 |
| Hlm    | 7829.0 | 2326.3 |
| Hlm1   | 2951.2 | 2333.7 |
| Hln    | 8885.9 | 1504.4 |
| Hln1   | 6031.6 | 2377.7 |
| Hln1a  | 4590.8 | 2517.1 |
| Hln1b  | 1229.8 | 3639.9 |
| Hln2   | 4457.1 | 2774.0 |
| Hln4   | 4174.0 | 3449.1 |
| Hlo    | 2486.0 | 3251.0 |
| Hlq    | 6231.6 | 3082.2 |
| Hlq1   | 2887.7 | 4638.0 |
| Hlr    | 6112.7 | 3706.0 |
| Hls    | 1932.8 | 3096.9 |
| Hlt    | 8266.3 | 1959.4 |
| Hlt1   | 4483.8 | 2869.4 |
| Hlt1a  | 2946.0 | 2355.7 |
| Hlt1a1 | 2027.5 | 1812.6 |
| Hlt2   | 1827.7 | 2495.1 |
| Hlu    | 6990.3 | 2590.5 |

|        |        |        |
|--------|--------|--------|
| H1u1   | 3083.7 | 2730.0 |
| H1v    | 5105.4 | 2913.4 |
| H1v1   | 2549.4 | 2502.5 |
| H1w    | 1932.8 | 2634.6 |
| H1x    | 1161.8 | 2502.5 |
| H1ae   | 7785.3 | 2216.3 |
| H1ae1  | 1790.9 | 2414.4 |
| H1ae2  | 5713.3 | 3074.9 |
| H1ae3  | 1172.3 | 1614.5 |
| H1af   | 4671.1 | 2634.6 |
| H1af1  | 3242.7 | 2333.7 |
| H1af1a | 1146.1 | 1519.1 |
| H1ag   | 4291.4 | 2311.7 |
| H1ag1a | 994.5  | 2069.5 |
| H1ag1b | 2808.4 | 2223.6 |
| H1ah   | 6887.1 | 2436.4 |
| H1ah1  | 1696.4 | 1952.1 |
| H1ai   | 1570.4 | 2135.5 |
| H1aj   | 8178.7 | 2957.5 |
| H1ak   | 4115.3 | 2546.5 |
| H1ak2  | 1329.3 | 1893.4 |
| H1am   | 1932.8 | 2641.9 |
| H1ao   | 5460.2 | 3537.2 |

|        |        |        |
|--------|--------|--------|
| H1ao1  | 3630.5 | 2619.9 |
| H1ap   | 1161.8 | 1607.2 |
| H1aq   | 6822.0 | 3060.2 |
| H1aq1  | 1313.6 | 5320.5 |
| H1ar   | 5363.4 | 3977.5 |
| H1ar1  | 1146.1 | 6017.7 |
| H1as   | 6410.1 | 3691.3 |
| H1as1  | 4019.3 | 2803.3 |
| H1as1a | 2655.0 | 2076.8 |
| H1as2  | 1659.6 | 2238.3 |
| H1at   | 5831.9 | 3544.5 |
| H1at1  | 2396.3 | 2935.4 |
| H1at1a | 931.8  | 1291.6 |
| H1au   | 7523.5 | 2964.8 |
| H1au1  | 5670.2 | 2774.0 |
| H1au1a | 3508.2 | 2715.3 |
| H1au1b | 3508.2 | 2810.7 |
| H1av   | 4644.4 | 5724.1 |
| H1av1  | 2750.2 | 1944.7 |
| H1av1a | 1025.9 | 1343.0 |
| H1aw   | 4275.4 | 2671.3 |
| H1ax   | 4949.8 | 2869.4 |
| H1ay   | 8737.7 | 1665.9 |

|       |         |        |
|-------|---------|--------|
| H1az  | 3635.8  | 3977.5 |
| H1ba  | 6112.7  | 3757.4 |
| H1bc  | 6112.7  | 5063.6 |
| H1be  | 1570.4  | 2142.9 |
| H1bf  | 5191.4  | 2803.3 |
| H1bf1 | 1502.2  | 2010.8 |
| H1bg  | 3747.6  | 3030.8 |
| H1bh  | 3976.6  | 3140.9 |
| H1bi  | 3635.8  | 4359.1 |
| H1bk  | 1932.8  | 2744.6 |
| H1bm  | 1932.8  | 2656.6 |
| H1bn  | 6898.0  | 3001.5 |
| H1bo  | 4483.8  | 2179.6 |
| H1bq  | 8726.7  | 1673.2 |
| H1br  | 6112.7  | 3808.7 |
| H1bs  | 7867.2  | 3537.2 |
| H1bt  | 1334.5  | 1820.0 |
| H1bv  | 1329.3  | 1827.3 |
| H1bw  | 6112.7  | 3698.7 |
| H1bx  | 1570.4  | 3816.1 |
| H2    | 11905.3 | 1364.4 |
| H2a   | 10531.8 | 1628.5 |
| H2a1  | 7713.4  | 1754.3 |



|          |        |        |
|----------|--------|--------|
| H2a1a    | 6043.8 | 1898.9 |
| H2a1a1   | 851.7  | 3407.9 |
| H2a1a2   | 851.7  | 1251.2 |
| H2a1b    | 4162.3 | 3062.1 |
| H2a1c    | 1784.9 | 2414.5 |
| H2a1d    | 1165.1 | 4407.6 |
| H2a1e    | 5167.0 | 2301.3 |
| H2a1e1   | 3869.9 | 2238.4 |
| H2a1e1a  | 2574.7 | 2150.4 |
| H2a1e1a1 | 0.0    | 3810.3 |
| H2a1f    | 1784.9 | 2420.7 |
| H2a2     | 9126.3 | 1873.7 |
| H2a2a    | 7037.0 | 2018.3 |
| H2a2a1   | 3801.5 | 2093.8 |
| H2a2a1a  | 2534.0 | 2024.6 |
| H2a2a1b  | 1268.2 | 2295.0 |
| H2a2a1d  | 1268.2 | 1792.0 |
| H2a2a2   | 3245.9 | 2747.7 |
| H2a2b    | 5406.4 | 2301.3 |
| H2a2b1   | 4395.7 | 2087.5 |
| H2a2b1a  | 3227.8 | 2062.3 |
| H2a2b1a1 | 1816.4 | 1634.8 |
| H2a2b2   | 1537.5 | 5382.2 |

|         |        |        |
|---------|--------|--------|
| H2a2b3  | 2647.1 | 2691.1 |
| H2a2b4  | 2651.7 | 2590.5 |
| H2a3    | 5203.8 | 3219.3 |
| H2a3b   | 2583.8 | 2980.3 |
| H2a4    | 7228.0 | 3678.3 |
| H2a5    | 5337.3 | 3175.3 |
| H2a5a   | 2457.1 | 1735.4 |
| H2a5a1a | 945.6  | 1232.4 |
| H2a5b   | 1645.4 | 1609.6 |
| H2a5b1  | 1645.4 | 2320.1 |
| H2b     | 6446.8 | 3980.1 |
| H2c     | 6187.3 | 2930.0 |
| H2c1    | 2149.9 | 1886.3 |
| H3      | 8919.0 | 1062.6 |
| H3a     | 5835.7 | 1974.3 |
| H3a1    | 4808.4 | 1905.2 |
| H3a1a   | 1447.7 | 1892.6 |
| H3g     | 6066.9 | 1628.5 |
| H3g1    | 3309.6 | 1748.0 |
| H3g1b   | 1852.4 | 1898.9 |
| H3g2    | 1618.4 | 2339.0 |
| H3g3    | 4244.6 | 2320.1 |
| H3g4    | 5051.9 | 1804.6 |

|        |        |        |
|--------|--------|--------|
| H3i    | 2620.0 | 2068.6 |
| H3i1   | 990.4  | 1320.4 |
| H3j    | 3127.8 | 5338.2 |
| H3k    | 4712.0 | 3099.8 |
| H3k1   | 1057.5 | 1540.5 |
| H3b    | 7961.4 | 1534.2 |
| H3b1   | 5420.3 | 1823.4 |
| H3b1a  | 3860.8 | 2081.2 |
| H3b1b  | 4524.0 | 1729.1 |
| H3b1b1 | 3132.3 | 1483.9 |
| H3b2   | 1708.4 | 4577.4 |
| H3b4   | 3064.2 | 2754.0 |
| H3c    | 8134.7 | 1333.0 |
| H3c1   | 6841.6 | 2012.0 |
| H3c2   | 5960.5 | 2125.2 |
| H3c2a  | 4221.8 | 2118.9 |
| H3c2a1 | 3318.7 | 2074.9 |
| H3c2b  | 3641.9 | 4659.1 |
| H3c2c  | 1605.0 | 2898.6 |
| H3e    | 1501.6 | 2024.6 |
| H3h    | 5674.0 | 2012.0 |
| H3h1   | 1569.0 | 2081.2 |
| H3h2   | 1569.0 | 4470.5 |

|       |        |        |
|-------|--------|--------|
| H3h3  | 4189.8 | 2427.0 |
| H3h3a | 1340.0 | 1760.5 |
| H3h4  | 815.9  | 1119.2 |
| H3m   | 4249.2 | 2842.0 |
| H3n   | 2841.9 | 2169.2 |
| H3p   | 6377.3 | 2911.2 |
| H3q   | 4075.5 | 2974.1 |
| H3r   | 3646.5 | 2917.5 |
| H3r1  | 1236.8 | 2269.8 |
| H3s   | 3232.3 | 3458.2 |
| H3t   | 3477.9 | 3169.0 |
| H3u   | 7256.0 | 2144.1 |
| H3u1  | 2046.2 | 1999.5 |
| H3v   | 6641.8 | 2640.8 |
| H3v1  | 905.3  | 2125.2 |
| H3w   | 3232.3 | 2313.9 |
| H3x   | 5983.6 | 2760.3 |
| H3x1  | 842.7  | 1295.3 |
| H3y   | 1263.7 | 1716.5 |
| H3z   | 7321.2 | 2012.0 |
| H3z1  | 4505.6 | 2760.3 |
| H3aa  | 3477.9 | 4376.2 |
| H3ab  | 1501.6 | 5438.8 |

|        |         |        |
|--------|---------|--------|
| H3ac   | 1870.4  | 2540.2 |
| H3ad   | 1870.4  | 2609.4 |
| H3ae   | 4757.9  | 3244.4 |
| H3af   | 4634.0  | 3036.9 |
| H3ah   | 5697.1  | 3477.1 |
| H3ai   | 4757.9  | 4200.1 |
| H3aj   | 1870.4  | 2540.2 |
| H3ak   | 5480.2  | 2540.2 |
| H3am   | 4757.9  | 4753.5 |
| H3ao   | 5222.2  | 3753.7 |
| H3ao1  | 4034.3  | 3407.9 |
| H3ap   | 5701.7  | 3778.9 |
| H3aq   | 1874.9  | 4872.9 |
| H3as   | 1870.4  | 2540.2 |
| H3at   | 4139.5  | 3389.0 |
| H3at1  | 1335.5  | 1810.8 |
| H3au   | 5706.3  | 3816.6 |
| H3av   | 932.2   | 1307.8 |
| H4     | 10617.3 | 1471.3 |
| H4a    | 9277.2  | 1559.3 |
| H4a1   | 8636.8  | 1559.3 |
| H4a1a  | 7835.0  | 1647.4 |
| H4a1a1 | 6600.0  | 2087.5 |

|            |         |        |
|------------|---------|--------|
| H4a1a1a    | 5891.1  | 1798.3 |
| H4a1a1a1   | 2656.2  | 1880.0 |
| H4a1a1a1a1 | 704.1   | 1301.5 |
| H4a1a1a3   | 3359.6  | 2320.1 |
| H4a1a1a4   | 1596.0  | 2112.6 |
| H4a1a2     | 2991.6  | 1936.6 |
| H4a1a2a1   | 2050.7  | 1779.4 |
| H4a1a3     | 4597.3  | 2621.9 |
| H4a1a3a    | 2371.2  | 2408.2 |
| H4a1a4     | 5544.8  | 2263.6 |
| H4a1a4a    | 2687.9  | 2603.1 |
| H4a1a4b    | 3482.5  | 1634.8 |
| H4a1a4b1   | 2769.4  | 1590.8 |
| H4a1a4b2   | 1200.9  | 1565.6 |
| H4a1c      | 4817.6  | 2772.8 |
| H4a1c1     | 1447.7  | 1924.0 |
| H4a1d      | 4528.6  | 3263.3 |
| H4b        | 7503.2  | 4319.6 |
| H4b1       | 2091.3  | 2848.3 |
| H4c        | 2588.3  | 5696.6 |
| H536       | 10294.4 | 3036.9 |
| H5         | 9877.6  | 1401.7 |
| H5a        | 9111.3  | 1387.0 |

|         |        |        |
|---------|--------|--------|
| H5a1    | 6567.1 | 1533.8 |
| H5a1a   | 2977.7 | 3199.6 |
| H5a1b   | 1675.4 | 2275.0 |
| H5a1c   | 4971.3 | 1805.3 |
| H5a1c1  | 1901.3 | 1724.6 |
| H5a1d   | 1675.4 | 2429.1 |
| H5a1e   | 2977.7 | 2737.3 |
| H5a1f   | 2977.7 | 2634.6 |
| H5a1g   | 5341.9 | 2311.7 |
| H5a1g1  | 2169.6 | 1651.2 |
| H5a1g1a | 598.0  | 829.3  |
| H5a1g2  | 1523.2 | 2135.5 |
| H5a1j   | 1675.4 | 2311.7 |
| H5a1k   | 5234.4 | 2084.2 |
| H5a1m   | 1911.8 | 1908.0 |
| H5a1n   | 1193.2 | 1629.2 |
| H5a1p   | 968.4  | 1365.0 |
| H5a2    | 4815.8 | 4058.2 |
| H5a3    | 6827.4 | 2003.4 |
| H5a3a   | 5848.1 | 2216.3 |
| H5a3a1  | 1208.9 | 6531.4 |
| H5a3a2  | 2988.3 | 2436.4 |
| H5a3b   | 3046.6 | 2957.5 |

|       |        |        |
|-------|--------|--------|
| H5a4  | 7588.9 | 1915.4 |
| H5a4a | 5051.8 | 2084.2 |
| H5a5  | 4703.3 | 4395.8 |
| H5a6  | 3566.7 | 2810.7 |
| H5a7  | 1518.0 | 2054.8 |
| H5b   | 7894.5 | 2399.7 |
| H5b1  | 1177.5 | 1724.6 |
| H5b2  | 2586.3 | 2502.5 |
| H5b3  | 6442.6 | 2575.8 |
| H5c   | 6437.2 | 2891.4 |
| H5c1  | 4451.8 | 3162.9 |
| H5d   | 3630.5 | 4278.4 |
| H5e   | 7676.2 | 3412.4 |
| H5e1  | 4227.3 | 3860.1 |
| H5e1a | 2232.9 | 2208.9 |
| H5f   | 1932.8 | 2641.9 |
| H5g   | 5030.3 | 7279.9 |
| H5h   | 2924.8 | 3559.2 |
| H5j   | 2454.3 | 1827.3 |
| H5k   | 1570.4 | 2333.7 |
| H5m   | 5707.9 | 3324.4 |
| H5n   | 6887.1 | 3207.0 |
| H5p   | 1932.8 | 2700.6 |



|          |         |        |
|----------|---------|--------|
| H5q      | 1549.4  | 5592.0 |
| H5r      | 2491.3  | 2238.3 |
| H5r1     | 957.9   | 2583.2 |
| H5r2     | 957.9   | 1298.9 |
| H5s      | 1434.1  | 5753.5 |
| H5t      | 2201.3  | 2810.7 |
| H36      | 2787.5  | 2672.2 |
| H6       | 10945.6 | 1873.7 |
| H6a      | 9503.8  | 1974.3 |
| H6a1     | 8669.7  | 1905.2 |
| H6a1a    | 7139.5  | 1993.2 |
| H6a1a1   | 5761.7  | 2854.6 |
| H6a1a1a  | 824.8   | 1138.1 |
| H6a1a2   | 6159.5  | 2093.8 |
| H6a1a2a  | 3979.5  | 2571.6 |
| H6a1a2b  | 3273.2  | 2301.3 |
| H6a1a2b1 | 1093.4  | 1477.6 |
| H6a1a3   | 2950.8  | 2666.0 |
| H6a1a4   | 4134.9  | 4206.4 |
| H6a1a5   | 1730.9  | 2320.1 |
| H6a1a6   | 3118.7  | 5206.2 |
| H6a1a7   | 2434.5  | 2942.6 |
| H6a1a8   | 2023.7  | 1898.9 |

|         |        |        |
|---------|--------|--------|
| H6a1b   | 7577.9 | 1829.7 |
| H6a1b2  | 4767.1 | 2188.1 |
| H6a1b2a | 1438.7 | 2024.6 |
| H6a1b2d | 1438.7 | 2760.3 |
| H6a1b3  | 3769.6 | 1854.9 |
| H6a1b3a | 1542.0 | 1408.4 |
| H6a1b4  | 3218.7 | 2974.1 |
| H6a2    | 6330.9 | 3194.1 |
| H6b     | 8036.3 | 2930.0 |
| H6b1    | 5863.4 | 4854.1 |
| H6c     | 3082.4 | 2948.9 |
| H7      | 8890.8 | 1685.1 |
| H7a     | 7381.9 | 4948.4 |
| H7a1    | 6483.9 | 2307.6 |
| H7a1a   | 5033.6 | 2207.0 |
| H7a1b   | 1667.9 | 5734.3 |
| H7a1c   | 2959.8 | 2917.5 |
| H7a2    | 2484.2 | 2609.4 |
| H7b     | 4066.3 | 1659.9 |
| H7b1    | 2168.0 | 1836.0 |
| H7b2    | 2168.0 | 2030.9 |
| H7b5    | 1317.5 | 3810.3 |
| H7c     | 7167.4 | 3062.1 |

|       |        |        |
|-------|--------|--------|
| H7c1  | 3127.8 | 4099.5 |
| H7c2  | 1735.4 | 6570.6 |
| H7c3  | 2439.0 | 5137.0 |
| H7d   | 7601.3 | 1748.0 |
| H7d1  | 3423.3 | 2672.2 |
| H7d2  | 3819.7 | 2829.4 |
| H7d2a | 1272.7 | 1704.0 |
| H7d3  | 5374.2 | 2559.1 |
| H7d3a | 3833.4 | 2433.3 |
| H7d4  | 1820.9 | 1942.9 |
| H7e   | 1497.1 | 2307.6 |
| H7f   | 4748.7 | 3659.4 |
| H7h   | 4748.7 | 3753.7 |
| H8    | 8341.0 | 3187.8 |
| H8a   | 4569.8 | 3351.3 |
| H8b   | 4322.4 | 3885.8 |
| H8c   | 6400.4 | 2276.1 |
| H8c2  | 2538.5 | 2112.6 |
| H31   | 3965.8 | 3439.3 |
| H31a  | 2127.4 | 2904.9 |
| H11   | 8425.5 | 2816.9 |
| H11a  | 6122.4 | 1892.6 |
| H11a1 | 2928.1 | 2087.5 |

|         |        |        |
|---------|--------|--------|
| H11a2   | 5406.4 | 1873.7 |
| H11a2a  | 3961.2 | 1603.3 |
| H11a2a1 | 1299.6 | 2030.9 |
| H11a2a2 | 1304.1 | 1213.5 |
| H11a3   | 0.0    | 9387.4 |
| H11a5   | 2860.1 | 3068.4 |
| H11b    | 2683.4 | 6344.2 |
| H12     | 4560.6 | 3584.0 |
| H9      | 6460.7 | 3125.0 |
| H9a     | 2556.6 | 2269.8 |
| H32     | 3437.0 | 3244.4 |
| H46     | 3236.8 | 6847.2 |
| H46a    | 0.0    | 8004.2 |
| H52     | 1775.9 | 6778.1 |
| H69     | 3236.8 | 4445.4 |
| H10     | 8594.5 | 2263.6 |
| H10a    | 6048.4 | 2364.2 |
| H10a1   | 4831.4 | 2093.8 |
| H10a1a  | 2267.3 | 2502.5 |
| H10a1a1 | 891.9  | 1251.2 |
| H10a1b  | 726.5  | 1175.8 |
| H10b    | 4689.1 | 2666.0 |
| H10b1   | 3023.4 | 2194.4 |

|          |         |        |
|----------|---------|--------|
| H10c     | 6548.9  | 2640.8 |
| H10c1    | 5084.1  | 2577.9 |
| H10d     | 4652.4  | 4678.0 |
| H10e     | 4689.1  | 2263.6 |
| H10e1    | 2769.4  | 3169.0 |
| H10e1a   | 1030.7  | 1672.5 |
| H10e2    | 2407.4  | 2647.1 |
| H10e3    | 2362.2  | 2131.5 |
| H10h     | 1236.8  | 1691.4 |
| H13      | 12475.9 | 867.7  |
| H13a     | 11785.7 | 1138.1 |
| H13a1    | 10090.5 | 1848.6 |
| H13a1a   | 8556.9  | 1748.0 |
| H13a1a1  | 5886.5  | 1892.6 |
| H13a1a1a | 4496.5  | 2181.8 |
| H13a1a1b | 3605.5  | 3219.3 |
| H13a1a1d | 2064.2  | 1659.9 |
| H13a1a1e | 2796.6  | 2452.2 |
| H13a1a2  | 7587.3  | 1980.6 |
| H13a1a3  | 5540.2  | 3112.4 |
| H13a2    | 10969.4 | 2219.5 |
| H13a2a   | 6516.4  | 3703.4 |
| H13a2b   | 9324.4  | 2496.2 |

|         |         |         |
|---------|---------|---------|
| H13a2b1 | 4098.3  | 3766.3  |
| H13a2c  | 5743.3  | 2716.3  |
| H13b    | 11527.5 | 1439.9  |
| H13b1   | 8073.8  | 4187.6  |
| H13b1a  | 0.0     | 10022.5 |
| H13c    | 11408.1 | 1666.2  |
| H14     | 11203.0 | 1672.5  |
| H14a    | 9314.9  | 2188.1  |
| H14a2   | 7111.5  | 3080.9  |
| H14b    | 9319.7  | 2791.7  |
| H14b1   | 1142.6  | 4652.9  |
| H14b2   | 1798.4  | 2697.4  |
| H15     | 8693.2  | 2710.0  |
| H15a    | 7433.2  | 2603.1  |
| H15a1   | 6136.3  | 2389.3  |
| H15a1a  | 2864.6  | 2728.8  |
| H15b    | 5507.9  | 3301.0  |
| H16     | 5969.7  | 3992.7  |
| H16a    | 2046.2  | 1886.3  |
| H16a1   | 824.8   | 1144.4  |
| H16b    | 2819.3  | 2628.2  |
| H17     | 7507.9  | 2816.9  |
| H17a    | 6099.3  | 2691.1  |

|        |         |         |
|--------|---------|---------|
| H17a1  | 4171.5  | 2798.0  |
| H17b   | 5024.4  | 3093.5  |
| H27    | 3906.5  | 2364.2  |
| H27a   | 999.3   | 1307.8  |
| H27b   | 999.3   | 1527.9  |
| H27d   | 2104.8  | 1880.0  |
| H18    | 3309.6  | 3665.7  |
| H20    | 10831.4 | 2301.3  |
| H20a   | 7363.2  | 3634.3  |
| H20b   | 1084.4  | 1678.8  |
| H23    | 2064.2  | 2842.0  |
| H24    | 5277.4  | 2999.2  |
| H24a   | 3696.6  | 2552.8  |
| H24a1  | 900.9   | 2213.2  |
| H24b   | 1519.6  | 11443.5 |
| H26    | 9991.0  | 2521.3  |
| H26a   | 5378.8  | 2948.9  |
| H26a1a | 3833.4  | 2879.7  |
| H26b   | 6753.3  | 2779.1  |
| H26c   | 2941.7  | 7620.6  |
| H28    | 9314.9  | 3590.2  |
| H28a   | 3546.2  | 2603.1  |
| H29    | 5881.9  | 3728.6  |

|       |         |        |
|-------|---------|--------|
| H30   | 11346.1 | 1886.3 |
| H30a  | 4395.7  | 3263.3 |
| H30b  | 9702.3  | 4263.0 |
| H30b1 | 3414.2  | 2791.7 |
| H33   | 7503.2  | 3659.4 |
| H33a  | 1766.9  | 2401.9 |
| H33b  | 3396.0  | 2766.6 |
| H34   | 4675.3  | 3804.0 |
| H64   | 4679.9  | 3521.1 |
| H85   | 3737.6  | 3973.8 |
| H35   | 9168.7  | 3319.9 |
| H35a  | 6516.4  | 4080.7 |
| H39   | 5120.9  | 3036.9 |
| H39a  | 1115.8  | 1534.2 |
| H39b  | 2556.6  | 2471.0 |
| H40   | 5116.3  | 5294.2 |
| H40a  | 5116.3  | 4363.6 |
| H40b  | 1115.8  | 6029.8 |
| H41   | 4840.5  | 2955.2 |
| H42   | 9008.5  | 3810.3 |
| H42a  | 4249.2  | 3477.1 |
| H42a1 | 1353.4  | 2659.7 |
| H43   | 3979.5  | 3917.2 |



|      |         |        |
|------|---------|--------|
| H44  | 10512.8 | 2791.7 |
| H44a | 3719.4  | 2917.5 |
| H44b | 6604.6  | 3659.4 |
| H45  | 9079.2  | 4137.3 |
| H45a | 1510.6  | 2992.9 |
| H45b | 3851.7  | 3338.7 |
| H47  | 8937.9  | 3036.9 |
| H47a | 1263.7  | 1754.3 |
| H48  | 3979.5  | 4231.6 |
| H49  | 8345.7  | 2948.9 |
| H49a | 4849.7  | 2810.6 |
| H50  | 2064.2  | 5627.4 |
| H51  | 6925.3  | 4439.1 |
| H51a | 1326.5  | 1905.2 |
| H53  | 9145.2  | 5300.5 |
| H54  | 8270.6  | 4596.3 |
| H55  | 9385.7  | 3282.1 |
| H55a | 5494.0  | 3338.7 |
| H56  | 4693.7  | 2986.6 |
| H57  | 10664.9 | 3093.5 |
| H58  | 9877.3  | 3200.4 |
| H58a | 7461.2  | 3609.1 |
| H59  | 5678.6  | 4175.0 |

|       |         |        |
|-------|---------|--------|
| H60   | 7685.4  | 3860.6 |
| H61   | 4689.1  | 4445.4 |
| H62   | 7120.8  | 5432.5 |
| H63   | 3979.5  | 3395.3 |
| H65   | 8162.8  | 4483.1 |
| H66   | 1735.4  | 3112.4 |
| H67   | 9470.7  | 3464.5 |
| H67a  | 3952.1  | 3093.5 |
| H70   | 8261.2  | 4659.1 |
| H71   | 9796.9  | 3389.0 |
| H72   | 2860.1  | 6941.6 |
| H73   | 7905.2  | 4156.1 |
| H73a  | 1411.8  | 1741.7 |
| H73a1 | 610.4   | 1150.6 |
| H76   | 5881.9  | 6017.3 |
| H78   | 10289.7 | 2936.3 |
| H79   | 5480.2  | 4149.8 |
| H79a  | 2669.8  | 2621.9 |
| H80   | 1735.4  | 2452.2 |
| H81   | 8270.6  | 3998.9 |
| H83   | 3975.0  | 5388.5 |
| H86   | 3979.5  | 4049.2 |
| H87   | 5678.6  | 5583.4 |

|         |         |        |
|---------|---------|--------|
| R1      | 11420.5 | 3550.4 |
| R1a     | 8293.9  | 2605.9 |
| R1a1    | 7046.0  | 2334.8 |
| R1a1a   | 3973.8  | 2229.9 |
| R1a1a1  | 2130.3  | 1976.3 |
| R1a1b   | 2004.9  | 1993.8 |
| R2JT    | 53771.5 | 5719.0 |
| R2      | 13719.0 | 6934.6 |
| JT      | 46908.3 | 6549.8 |
| J       | 34258.3 | 4886.2 |
| J1      | 26935.1 | 5272.9 |
| J1b     | 16233.1 | 3466.1 |
| J1b1    | 13860.3 | 3269.2 |
| J1b1a   | 8287.7  | 3662.9 |
| J1b1a1  | 6971.3  | 2341.2 |
| J1b1a1a | 4073.0  | 2713.8 |
| J1b1a1b | 1992.2  | 1856.1 |
| J1b1a1c | 5206.5  | 2671.6 |
| J1b1a3  | 5407.3  | 3290.3 |
| J1b1b   | 11853.5 | 3388.7 |
| J1b1b1  | 7826.8  | 3754.3 |
| J1b2    | 6166.7  | 5561.2 |
| J1b3    | 3181.4  | 3086.4 |

|         |         |        |
|---------|---------|--------|
| J1b4    | 2851.5  | 2791.1 |
| J1c     | 13072.3 | 1919.3 |
| J1c1    | 10090.8 | 2228.7 |
| J1c1a   | 1173.0  | 1778.7 |
| J1c1b   | 8781.4  | 2313.1 |
| J1c1b1  | 7555.1  | 2671.6 |
| J1c1b1a | 5052.1  | 3445.0 |
| J1c1b2  | 2952.9  | 2242.7 |
| J1c1b2a | 762.6   | 1061.6 |
| J1c1c   | 5799.5  | 3965.2 |
| J1c2    | 9762.5  | 2010.7 |
| J1c2a   | 6836.0  | 3388.7 |
| J1c2b   | 6758.1  | 2692.7 |
| J1c2b1  | 1077.8  | 3726.2 |
| J1c2b2  | 3986.2  | 3002.0 |
| J1c2c   | 4543.9  | 2313.1 |
| J1c2c1  | 2942.8  | 2249.8 |
| J1c2c2  | 2204.0  | 1792.8 |
| J1c2c2a | 872.6   | 1321.7 |
| J1c2d   | 1559.4  | 4851.1 |
| J1c2e   | 7962.9  | 2383.4 |
| J1c2e1  | 1423.8  | 2017.8 |
| J1c2e2  | 2598.3  | 2875.5 |

|         |         |        |
|---------|---------|--------|
| J1c2e3  | 4826.0  | 2594.3 |
| J1c2f   | 1926.7  | 3128.6 |
| J1c2g   | 2466.7  | 2748.9 |
| J1c3    | 8855.1  | 2242.7 |
| J1c3a   | 4303.2  | 2713.8 |
| J1c3a1  | 1363.6  | 1806.9 |
| J1c3a2  | 2264.6  | 2151.4 |
| J1c3b   | 4113.9  | 2467.7 |
| J1c3b1  | 2093.0  | 2270.9 |
| J1c3b1a | 837.6   | 2819.3 |
| J1c3b2  | 1328.4  | 4443.3 |
| J1c3c   | 4206.0  | 2756.0 |
| J1c3c1  | 1343.5  | 1785.8 |
| J1c3d   | 3945.3  | 3023.1 |
| J1c3e   | 7299.4  | 2601.3 |
| J1c3e1  | 3991.3  | 2636.5 |
| J1c3e2  | 4918.5  | 3016.1 |
| J1c3f   | 1866.3  | 2692.7 |
| J1c3g   | 5675.5  | 4323.8 |
| J1c4    | 4073.0  | 3086.4 |
| J1c4b   | 2173.8  | 2601.3 |
| J1c4c   | 1323.4  | 1827.9 |
| J1c5    | 10632.1 | 2320.1 |

|        |         |        |
|--------|---------|--------|
| J1c5a  | 6898.4  | 3184.8 |
| J1c5a1 | 4037.3  | 3564.5 |
| J1c5b  | 5227.0  | 3494.2 |
| J1c5c  | 5221.9  | 3691.0 |
| J1c5d  | 6021.8  | 3184.8 |
| J1c7   | 5949.4  | 3965.2 |
| J1c7a  | 1982.1  | 5371.3 |
| J1c12  | 5660.0  | 3571.5 |
| J1c13  | 1087.8  | 2249.8 |
| J1c14  | 992.7   | 2917.7 |
| J1c8   | 6177.1  | 3416.9 |
| J1c8a  | 1243.2  | 5174.5 |
| J1c9   | 4001.5  | 3768.4 |
| J1c10  | 7774.5  | 3845.7 |
| J1c11  | 4733.6  | 3501.2 |
| J1d    | 16556.3 | 4422.2 |
| J1d1   | 14331.5 | 4612.0 |
| J1d2   | 12014.1 | 5104.2 |
| J2     | 28259.7 | 4605.0 |
| J2a    | 24051.5 | 4183.2 |
| J2a1   | 21186.1 | 4485.5 |
| J2a1a  | 12986.1 | 4077.7 |
| J2a1a1 | 8949.8  | 3051.3 |

|           |         |        |
|-----------|---------|--------|
| J2a1a1a   | 7591.6  | 2889.6 |
| J2a1a1a1  | 3960.7  | 2664.6 |
| J2a1a1a2  | 3618.9  | 2973.9 |
| J2a1a1a2a | 697.6   | 1005.4 |
| J2a1a1b   | 1504.1  | 6250.2 |
| J2a1a1c   | 0.0     | 9203.0 |
| J2a1a2    | 9778.4  | 3831.7 |
| J2a2      | 16052.5 | 3880.9 |
| J2a2a     | 12819.3 | 3944.1 |
| J2a2b     | 12287.5 | 5258.9 |
| J2b       | 13379.5 | 5055.0 |
| J2b1      | 9281.8  | 3107.5 |
| J2b1a     | 7518.5  | 2179.5 |
| J2b1a1    | 6451.7  | 2355.2 |
| J2b1a1a   | 2279.8  | 2214.6 |
| J2b1a2    | 5031.6  | 2882.5 |
| J2b1a3    | 4282.7  | 3044.2 |
| J2b1a4    | 2512.3  | 2559.1 |
| J2b1b     | 1288.3  | 2889.6 |
| T         | 25149.4 | 4668.3 |
| T1        | 16309.7 | 6538.4 |
| T1a       | 14684.3 | 4823.0 |
| T1a1      | 6997.3  | 2088.1 |

|        |         |        |
|--------|---------|--------|
| T1a1a  | 3649.5  | 3522.3 |
| T1a1a1 | 1238.1  | 4112.9 |
| T1a1b  | 3863.7  | 2460.7 |
| T1a1c  | 2401.0  | 2559.1 |
| T1a1i  | 2401.0  | 2988.0 |
| T1a1j  | 5221.9  | 2495.8 |
| T1a1k  | 4764.4  | 2938.8 |
| T1a3   | 4119.0  | 3592.6 |
| T1a2   | 12308.9 | 3887.9 |
| T1a2a  | 3965.8  | 3213.0 |
| T1a4   | 9371.5  | 4464.4 |
| T1a5   | 10844.9 | 5427.6 |
| T1a6   | 1815.9  | 9730.3 |
| T1b    | 6161.5  | 4801.9 |
| T2     | 19316.5 | 2545.1 |
| T2a    | 17105.4 | 2868.5 |
| T2a1   | 15222.8 | 2741.9 |
| T2a1a  | 6425.8  | 2165.4 |
| T2a1a2 | 2942.8  | 2720.8 |
| T2a1a3 | 1042.7  | 1406.1 |
| T2a1a5 | 1659.9  | 2214.6 |
| T2a1a6 | 3843.3  | 2868.5 |
| T2a1a7 | 1659.9  | 4239.4 |



|           |         |         |
|-----------|---------|---------|
| T2a1b     | 13930.7 | 2685.7  |
| T2a1b1    | 10946.0 | 2777.1  |
| T2a1b1a   | 9498.2  | 2671.6  |
| T2a1b1a1  | 8408.4  | 2664.6  |
| T2a1b1a1a | 7054.5  | 3339.5  |
| T2a1b2    | 10743.8 | 3325.5  |
| T2b       | 10069.6 | 1610.0  |
| T2b1      | 3664.8  | 3480.1  |
| T2b2      | 6462.1  | 3515.3  |
| T2b2b     | 3318.6  | 2952.8  |
| T2b2b1    | 832.6   | 1195.2  |
| T2b3      | 9202.7  | 1961.5  |
| T2b3a     | 3833.1  | 2847.4  |
| T2b3c     | 7137.9  | 2263.8  |
| T2b3d     | 4482.4  | 3740.3  |
| T2b3e     | 3410.2  | 3142.7  |
| T2b3b     | 1891.4  | 11031.0 |
| T2b4      | 5815.0  | 4851.1  |
| T2b4a     | 3573.1  | 2847.4  |
| T2b4b     | 1921.7  | 3613.7  |
| T2b4f     | 1921.7  | 2024.8  |
| T2b21     | 6399.9  | 3416.9  |
| T2b5      | 4964.7  | 3107.5  |

|        |         |         |
|--------|---------|---------|
| T2b5a  | 2199.0  | 2193.5  |
| T2b5a1 | 872.6   | 1434.2  |
| T2b6   | 5273.4  | 3437.9  |
| T2b6a  | 3318.6  | 3086.4  |
| T2b6b  | 1198.0  | 1321.7  |
| T2b7   | 10069.6 | 4548.8  |
| T2b7a  | 6498.4  | 3880.9  |
| T2b7a1 | 2289.9  | 3536.4  |
| T2b7a2 | 2289.9  | 2193.5  |
| T2b9   | 2244.4  | 2228.7  |
| T2b11  | 2958.0  | 2770.0  |
| T2b13  | 4477.3  | 2538.0  |
| T2b13a | 2330.3  | 2158.4  |
| T2b13b | 2907.3  | 2601.3  |
| T2b15  | 0.0     | 13871.3 |
| T2b16  | 1936.8  | 3691.0  |
| T2b17  | 5716.8  | 3986.3  |
| T2b17a | 1193.0  | 1638.1  |
| T2b19  | 6758.1  | 2917.7  |
| T2b19b | 4564.4  | 2566.2  |
| T2b22  | 0.0     | 7958.6  |
| T2b23  | 8387.4  | 1996.7  |
| T2b23a | 6752.9  | 2186.5  |

|        |         |        |
|--------|---------|--------|
| T2b24  | 5716.8  | 3880.9 |
| T2b24a | 1193.0  | 1638.1 |
| T2b25  | 6856.8  | 3262.2 |
| T2c    | 14591.9 | 3571.5 |
| T2c1   | 10520.5 | 3571.5 |
| T2c1a  | 1856.2  | 1806.9 |
| T2c2   | 5882.2  | 3909.0 |
| T2c3   | 11084.5 | 4204.3 |
| T2d    | 13584.7 | 3937.1 |
| T2e    | 11858.8 | 3234.1 |
| T2e1   | 9176.4  | 2896.6 |
| T2e1a  | 7847.8  | 2945.8 |
| T2e2   | 9931.8  | 3445.0 |
| T2e5   | 3196.6  | 3058.3 |
| T2f    | 11260.4 | 3670.0 |
| T2f1   | 3792.2  | 2524.0 |
| T2f1a  | 2527.4  | 2214.6 |
| T2f2   | 3506.9  | 4457.4 |
| T2f3   | 3120.4  | 3880.9 |
| T2f4   | 7576.0  | 4288.6 |
| T2f5   | 4677.2  | 3430.9 |
| T2g    | 15713.6 | 5301.0 |
| T2g1   | 3135.7  | 8057.0 |

|        |         |        |
|--------|---------|--------|
| T2g2   | 5995.9  | 4162.1 |
| T2g2a  | 2887.0  | 3283.3 |
| T2h    | 15500.8 | 4569.9 |
| T2j    | 16457.7 | 4422.2 |
| R3     | 12245.8 | 6768.4 |
| R5     | 33969.5 | 9662.9 |
| R5a    | 30665.3 | 8552.3 |
| R5a1   | 16993.4 | 7013.3 |
| R5a1a  | 1679.2  | 2334.8 |
| R5a2   | 16277.0 | 5754.0 |
| R5a2a  | 10698.1 | 5395.5 |
| R5a2b  | 8437.5  | 2973.2 |
| R5a2b1 | 3390.6  | 3270.5 |
| R5a2b2 | 7597.3  | 2981.9 |
| R5a2b3 | 5480.1  | 3629.1 |
| R5a2b4 | 3390.6  | 4407.3 |
| R6     | 43855.2 | 9645.4 |
| R6a    | 41310.8 | 8832.2 |
| R6a1   | 29883.5 | 8692.2 |
| R6a1a  | 2557.6  | 2658.4 |
| R7     | 31551.2 | 5780.3 |
| R7a    | 16426.9 | 5981.4 |
| R7a1   | 9419.6  | 3515.4 |

|         |         |        |
|---------|---------|--------|
| R7a1a   | 4132.7  | 3392.9 |
| R7a1b   | 6309.5  | 3585.3 |
| R7a1b1  | 2249.6  | 2116.2 |
| R7a1b2  | 1647.9  | 3148.1 |
| R7b     | 23926.4 | 5509.2 |
| R7b1    | 15020.9 | 5614.1 |
| R7b1a   | 9518.1  | 4381.1 |
| R7b1a1  | 2595.4  | 3331.7 |
| R7b2    | 12599.6 | 5605.4 |
| R8      | 32783.3 | 6890.8 |
| R8a     | 25618.7 | 6121.3 |
| R8a1    | 15943.5 | 4197.5 |
| R8a1a   | 13954.5 | 2894.5 |
| R8a1a1  | 12092.4 | 2588.4 |
| R8a1a1a | 9754.8  | 3235.5 |
| R8a1a1b | 9327.7  | 3672.8 |
| R8a1a1c | 9327.7  | 4328.6 |
| R8a1a1d | 4897.6  | 3506.6 |
| R8a1a2  | 9413.1  | 3550.4 |
| R8a1a2a | 2935.6  | 2238.6 |
| R8a1a3  | 11009.2 | 5019.5 |
| R8a1b   | 1679.2  | 2317.3 |
| R8a2    | 20279.6 | 6532.3 |

|         |         |        |
|---------|---------|--------|
| R8b     | 14237.4 | 5343.0 |
| R8b1    | 10976.1 | 4241.2 |
| R8b1a   | 8613.9  | 4311.1 |
| R8b2    | 1260.7  | 6969.5 |
| R9      | 46709.5 | 7651.6 |
| R9b     | 38480.9 | 8736.0 |
| R9b1    | 22526.5 | 6882.1 |
| R9b1a   | 16972.9 | 5028.2 |
| R9b1a1  | 9590.4  | 4407.3 |
| R9b1a1a | 5987.5  | 4092.5 |
| R9b1a2  | 8170.0  | 4459.8 |
| R9b1b   | 6819.6  | 5456.7 |
| R9b2    | 2860.0  | 3436.7 |
| R9c     | 46709.5 | 6296.2 |
| R9c1    | 8215.6  | 5150.6 |
| F       | 42939.3 | 5561.6 |
| F1      | 31543.9 | 7520.5 |
| F1acf   | 23123.4 | 5246.8 |
| F1a     | 18730.0 | 4424.8 |
| F1a14   | 16501.9 | 4416.1 |
| F1a1    | 10863.5 | 2990.7 |
| F1a1a   | 7655.8  | 3043.2 |
| F1a1a1  | 5634.1  | 3043.2 |

|           |         |        |
|-----------|---------|--------|
| F1a1b     | 3068.2  | 3148.1 |
| F1a1c     | 6303.1  | 3462.9 |
| F1a1c1    | 874.5   | 3900.1 |
| F1a1d     | 3068.2  | 3016.9 |
| F1a4      | 5659.8  | 3296.8 |
| F1a2      | 8659.6  | 5386.7 |
| F1a3      | 7169.1  | 5168.1 |
| F1c       | 18427.0 | 6051.3 |
| F1f       | 6910.1  | 5404.2 |
| F1b       | 11759.5 | 4468.5 |
| F1b1a     | 8235.2  | 2868.3 |
| F1b1a1    | 6942.5  | 2667.1 |
| F1b1a1a   | 5249.4  | 2133.7 |
| F1b1a1a1  | 4132.7  | 1967.6 |
| F1b1a1a1a | 2721.3  | 2090.0 |
| F1b1a1a2  | 1516.6  | 2020.0 |
| F1d       | 6393.3  | 5037.0 |
| F1e       | 23243.0 | 6270.0 |
| F1e1      | 1279.4  | 1783.9 |
| F1e2      | 5025.4  | 3926.4 |
| F2        | 18330.6 | 6095.1 |
| F2a       | 9939.1  | 6812.1 |
| F3        | 26373.2 | 6121.3 |

|          |         |        |
|----------|---------|--------|
| F3a      | 20168.6 | 6532.3 |
| F3b      | 21421.2 | 6296.2 |
| F3b1     | 5897.5  | 5360.5 |
| F4       | 35138.7 | 6497.3 |
| F4a      | 18234.4 | 6261.2 |
| F4a1     | 2343.8  | 3008.2 |
| F4b      | 8914.8  | 6112.6 |
| R11B6    | 44386.2 | 7791.5 |
| R11      | 21344.4 | 6409.9 |
| R11b     | 18950.7 | 6374.9 |
| B6       | 19019.7 | 7686.6 |
| B45      | 49544.7 | 6619.4 |
| B4       | 42947.5 | 5430.6 |
| B4a      | 24194.5 | 4520.6 |
| B4a1     | 21811.9 | 4667.4 |
| B4a1a    | 9540.9  | 2289.6 |
| B4a1a1   | 7196.9  | 2304.3 |
| B4a1a1a  | 5358.0  | 2275.0 |
| B4a1a1a1 | 2628.6  | 3493.2 |
| B4a1a1a2 | 1146.1  | 1555.8 |
| B4a1a1a4 | 3354.2  | 2443.8 |
| B4a1a1b  | 4158.0  | 4072.9 |
| B4a1a2   | 4168.6  | 3162.9 |



|         |         |        |
|---------|---------|--------|
| B4a1a3  | 7245.8  | 3162.9 |
| B4a1a4  | 2877.1  | 4021.6 |
| B4a1a5  | 7251.3  | 2972.1 |
| B4a1b   | 6404.7  | 3750.0 |
| B4a1b1  | 3965.9  | 2715.3 |
| B4a1b1a | 2127.5  | 1966.7 |
| B4a1c   | 19721.5 | 5093.0 |
| B4a1c1  | 17352.2 | 5489.3 |
| B4a1c2  | 3556.1  | 3192.3 |
| B4a1c4  | 14635.3 | 5247.1 |
| B4a1c3  | 16818.5 | 5445.2 |
| B4a1c3a | 2080.1  | 2032.8 |
| B4a2    | 17674.2 | 5195.7 |
| B4a2a   | 12661.5 | 5188.4 |
| B4a3    | 7278.5  | 4850.8 |
| B4g     | 15163.2 | 6758.9 |
| B4h     | 19634.4 | 7558.8 |
| B4bde   | 37308.0 | 5393.9 |
| B4b     | 28712.2 | 4821.5 |
| B2      | 16818.5 | 2619.9 |
| B2a     | 12134.9 | 3162.9 |
| B2a1    | 8825.5  | 3405.1 |
| B2a1a   | 5153.8  | 3449.1 |

|         |         |        |
|---------|---------|--------|
| B2a1a1  | 1497.0  | 2891.4 |
| B2a2    | 9789.2  | 3684.0 |
| B2b     | 14255.9 | 3904.1 |
| B2c     | 9226.9  | 5093.0 |
| B2c1    | 5837.3  | 3918.8 |
| B2d     | 2898.3  | 2847.4 |
| B2g     | 13510.6 | 3111.6 |
| B2g1    | 10969.3 | 3537.2 |
| B2h     | 6773.2  | 4704.0 |
| B2i     | 5950.6  | 3595.9 |
| B4b1    | 25156.8 | 5049.0 |
| B4b1a   | 19344.1 | 5203.1 |
| B4b1a1  | 3317.0  | 2201.6 |
| B4b1a1a | 1853.9  | 1952.1 |
| B4b1a2  | 15237.2 | 3838.1 |
| B4b1a2a | 10736.0 | 4315.1 |
| B4b1a2b | 5089.3  | 6590.1 |
| B4b1a2c | 1680.6  | 9070.5 |
| B4b1a2d | 1135.6  | 1636.5 |
| B4b1bc  | 21641.9 | 5929.6 |
| B4b1b   | 3502.9  | 3405.1 |
| B4b1c   | 16898.7 | 6913.0 |
| B4d     | 27021.1 | 7800.9 |

|         |         |        |
|---------|---------|--------|
| B4d123  | 20589.1 | 5276.5 |
| B4d1    | 15544.4 | 6017.7 |
| B4d3    | 3200.3  | 2583.2 |
| B4c     | 34160.3 | 6597.4 |
| B4c1    | 30123.0 | 6957.0 |
| B4c1ab  | 27555.4 | 6590.1 |
| B4c1a   | 11125.1 | 6582.7 |
| B4c1a1  | 8375.8  | 3126.2 |
| B4c1a1a | 5019.6  | 2832.7 |
| B4c1a2  | 1885.5  | 7676.2 |
| B4c1b   | 22581.8 | 4858.2 |
| B4c1b1  | 5934.5  | 3045.5 |
| B4c1b1a | 2401.6  | 1922.7 |
| B4c1b2  | 14499.3 | 4351.8 |
| B4c1b2a | 9138.8  | 4337.1 |
| B4c1b2b | 8085.8  | 4505.9 |
| B4c1c   | 9960.5  | 4315.1 |
| B4c1c1  | 3433.8  | 3229.0 |
| B4c2    | 7109.9  | 3676.6 |
| B4c2a   | 4821.1  | 3390.4 |
| B4f     | 15641.3 | 5115.0 |
| B4f1    | 7719.8  | 4117.0 |
| B5      | 41561.3 | 5797.5 |

|        |         |        |
|--------|---------|--------|
| B5a    | 27651.6 | 5914.9 |
| B5a1   | 22470.0 | 5232.4 |
| B5a1a  | 8737.7  | 5922.3 |
| B5a1a1 | 3444.5  | 3419.8 |
| B5a1b  | 14272.9 | 5687.4 |
| B5a2   | 14459.7 | 5467.3 |
| B5a2a  | 9122.3  | 5100.3 |
| B5b    | 25556.0 | 4219.7 |
| B5b1   | 22546.5 | 4271.1 |
| B5b1ab | 17415.4 | 5056.3 |
| B5b1a  | 6502.1  | 3955.5 |
| B5b1b  | 2464.9  | 2531.8 |
| B5b1c  | 9485.8  | 4351.8 |
| B5b2   | 18764.8 | 4271.1 |
| B5b2ab | 15436.3 | 4322.4 |
| B5b2a  | 4473.1  | 4043.6 |
| B5b2b  | 7327.4  | 3801.4 |
| B5b2b1 | 1366.0  | 2319.0 |
| B5b2c  | 5336.5  | 3229.0 |
| B5b3   | 8025.6  | 5320.5 |
| R24    | 17986.9 | 6847.1 |
| R22    | 31369.4 | 7494.2 |
| R30    | 53576.8 | 3961.4 |

|       |         |        |
|-------|---------|--------|
| R30a  | 19261.4 | 6943.3 |
| R30b  | 50977.0 | 4713.4 |
| R30b1 | 14203.7 | 5281.8 |
| R31   | 54895.0 | 3113.1 |
| R31a  | 10724.6 | 4591.0 |
| R31a1 | 1810.6  | 1775.2 |
| R31b  | 14176.7 | 6086.3 |
| P     | 54801.3 | 2501.0 |
| P1    | 32929.4 | 6165.0 |
| P1d   | 29673.9 | 6121.3 |
| P1d1  | 26458.7 | 6427.4 |
| P210  | 50204.3 | 5141.9 |
| P3    | 41265.7 | 5255.6 |
| P3a   | 25022.6 | 7153.2 |
| P3b   | 35514.7 | 5649.1 |
| P3b1  | 20926.2 | 5885.2 |
| P4    | 52962.1 | 4407.3 |
| P4a   | 18633.6 | 4512.3 |
| P4a1  | 14399.2 | 4241.2 |
| P4b   | 40094.8 | 7126.9 |
| P4b1  | 16215.7 | 6436.1 |
| P6    | 48157.1 | 6803.4 |
| U     | 46531.1 | 3289.3 |

|          |         |        |
|----------|---------|--------|
| U1       | 31955.4 | 5352.5 |
| U1ac     | 24605.0 | 4779.8 |
| U1a      | 18462.2 | 3832.6 |
| U1a1     | 11153.0 | 4471.4 |
| U1a2     | 6240.1  | 4383.3 |
| U1a3     | 13652.9 | 4691.7 |
| U1a4     | 12460.4 | 5939.9 |
| U1b      | 13664.2 | 5829.7 |
| U1b1     | 11576.6 | 4985.4 |
| U5       | 30248.3 | 5330.5 |
| U5a      | 22440.5 | 4926.6 |
| U5a1     | 16936.2 | 2819.4 |
| U5a1a    | 12124.3 | 4030.9 |
| U5a1a1   | 6836.3  | 3928.1 |
| U5a1a1a  | 1398.1  | 1872.3 |
| U5a1a1b  | 3292.1  | 2643.2 |
| U5a1a1d  | 2039.0  | 2224.7 |
| U5a1a2   | 10281.1 | 3590.3 |
| U5a1a2a  | 2830.9  | 2533.1 |
| U5a1a2a1 | 1628.9  | 1762.1 |
| U5a1a2b  | 8358.1  | 3377.4 |
| U5a1a2b1 | 3090.5  | 2364.2 |
| U5a1g    | 7407.4  | 5044.1 |

|          |         |        |
|----------|---------|--------|
| U5a1b    | 8374.6  | 2760.7 |
| U5a1b1   | 6983.0  | 1967.7 |
| U5a1b1a  | 5006.0  | 2525.7 |
| U5a1b1a1 | 1476.7  | 2422.9 |
| U5a1b1b  | 3085.2  | 5198.3 |
| U5a1b1c  | 4920.1  | 2349.5 |
| U5a1b1c1 | 2487.3  | 2606.5 |
| U5a1b1c2 | 2466.1  | 2210.0 |
| U5a1b1d  | 4074.6  | 4339.3 |
| U5a1b1e  | 5210.1  | 2613.8 |
| U5a1b1f  | 3856.0  | 2929.5 |
| U5a1b2   | 3377.1  | 4133.7 |
| U5a1b3   | 2012.7  | 1997.1 |
| U5a1b4   | 4582.4  | 4420.0 |
| U5a1c    | 14608.9 | 4016.2 |
| U5a1c1   | 4989.9  | 4552.2 |
| U5a1c2   | 12932.0 | 4045.6 |
| U5a1c2a  | 5888.9  | 4309.9 |
| U5a1d    | 15102.8 | 3223.2 |
| U5a1d1   | 7587.3  | 5704.9 |
| U5a1d2   | 13568.3 | 3509.6 |
| U5a1d2a  | 3451.5  | 2709.3 |
| U5a1d2a1 | 1434.8  | 2290.8 |

|          |         |        |
|----------|---------|--------|
| U5a1d2b  | 4234.8  | 3201.2 |
| U5a1e    | 6798.3  | 5389.2 |
| U5a1f    | 15518.3 | 3113.1 |
| U5a1f1   | 10763.7 | 3920.7 |
| U5a1f1a  | 6505.4  | 3590.3 |
| U5a1f1a1 | 4909.4  | 3120.4 |
| U5a1h    | 1015.9  | 2239.4 |
| U5a2     | 18416.0 | 3876.7 |
| U5a2a    | 12965.7 | 5917.8 |
| U5a2a1   | 6094.1  | 2635.9 |
| U5a2a1a  | 1235.7  | 1923.7 |
| U5a2a1b  | 3021.6  | 2320.1 |
| U5a2a1b1 | 1718.2  | 1945.7 |
| U5a2a1c  | 2852.1  | 3105.8 |
| U5a2a1d  | 2450.3  | 3105.8 |
| U5a2b    | 11437.2 | 3186.5 |
| U5a2b1   | 10236.8 | 4464.1 |
| U5a2b1a  | 8117.2  | 4155.7 |
| U5a2b1b  | 6250.9  | 5609.5 |
| U5a2b2   | 3440.9  | 2591.8 |
| U5a2b3   | 6175.2  | 3406.8 |
| U5a2b4   | 8385.5  | 4552.2 |
| U5a2c    | 11442.7 | 3274.6 |



|           |         |        |
|-----------|---------|--------|
| U5a2c1    | 3840.0  | 3583.0 |
| U5a2c2    | 8380.0  | 3964.8 |
| U5a2c3    | 9011.4  | 3340.7 |
| U5a2c4    | 2012.7  | 3590.3 |
| U5a2d     | 16936.2 | 3847.3 |
| U5a2d1    | 6407.9  | 4302.5 |
| U5a2e     | 2307.8  | 3392.1 |
| U5b       | 22794.0 | 3590.3 |
| U5b1      | 15529.7 | 4889.9 |
| U5b1a     | 8654.3  | 4478.8 |
| U5b1b     | 10819.3 | 4251.1 |
| U5b1b1    | 7216.8  | 3994.2 |
| U5b1b1a   | 3627.0  | 1916.3 |
| U5b1b1a1  | 2281.4  | 1681.4 |
| U5b1b1a1a | 1356.2  | 1644.7 |
| U5b1b1d   | 4272.2  | 2290.8 |
| U5b1b1f   | 3451.5  | 2929.5 |
| U5b1b1b   | 0.0     | 9948.7 |
| U5b1b1e   | 1912.7  | 1901.6 |
| U5b1b2    | 1981.1  | 2782.7 |
| U5b1c     | 10380.8 | 3267.3 |
| U5b1c1    | 8024.2  | 3729.9 |
| U5b1c1a   | 1188.5  | 2900.2 |

|           |         |        |
|-----------|---------|--------|
| U5b1c2    | 6733.2  | 2804.7 |
| U5b1c2a   | 2873.3  | 2408.2 |
| U5b1c2b   | 2344.7  | 2797.4 |
| U5b1e     | 3611.0  | 2481.7 |
| U5b1e1    | 2603.5  | 1872.3 |
| U5b1e1a   | 984.5   | 2070.5 |
| U5b1f     | 1870.6  | 3494.9 |
| U5b1d     | 11699.4 | 4346.6 |
| U5b1d1    | 9082.9  | 3788.6 |
| U5b1d1a   | 4026.6  | 2643.2 |
| U5b1g     | 1319.5  | 2951.6 |
| U5b2      | 20040.2 | 3208.6 |
| U5b2a     | 14938.0 | 3656.4 |
| U5b2a1    | 13483.7 | 4155.7 |
| U5b2a1a   | 10619.3 | 3810.6 |
| U5b2a1a1  | 4325.7  | 3414.1 |
| U5b2a1a1a | 1366.6  | 1989.7 |
| U5b2a1a1b | 4325.7  | 3098.4 |
| U5b2a1a2  | 2265.6  | 2503.7 |
| U5b2a1b   | 2592.9  | 2533.1 |
| U5b2a2    | 10780.4 | 3333.4 |
| U5b2a2a   | 4866.5  | 3157.2 |
| U5b2a2a1  | 1455.8  | 2026.5 |

|           |         |         |
|-----------|---------|---------|
| U5b2a2b   | 4737.8  | 2555.1  |
| U5b2a2b1  | 2423.9  | 2136.6  |
| U5b2a2c   | 1387.6  | 1923.7  |
| U5b2a3    | 8522.6  | 5528.7  |
| U5b2a4    | 5527.6  | 4618.3  |
| U5b2a4a   | 2688.1  | 2599.1  |
| U5b2a5    | 1089.1  | 1519.8  |
| U5b2a6    | 6002.3  | 5719.6  |
| U5b2b     | 14676.9 | 2716.6  |
| U5b2b1    | 12533.3 | 3304.0  |
| U5b2b1a   | 9325.2  | 3443.5  |
| U5b2b1a1  | 4871.8  | 4030.9  |
| U5b2b1a2  | 6760.3  | 3304.0  |
| U5b2b1b   | 3270.9  | 3421.5  |
| U5b2b2    | 9882.6  | 4192.4  |
| U5b2b3    | 8769.6  | 2966.3  |
| U5b2b3a   | 4866.5  | 2459.6  |
| U5b2b3a1  | 3541.9  | 2327.5  |
| U5b2b3a1a | 2381.7  | 1997.1  |
| U5b2b4    | 1812.8  | 10800.4 |
| U5b2c     | 12651.1 | 5668.2  |
| U5b2c1    | 4015.9  | 3898.7  |
| U5b2c2    | 2836.2  | 3318.7  |

|         |         |        |
|---------|---------|--------|
| U5b3    | 10508.4 | 2885.5 |
| U5b3a   | 9082.9  | 3061.7 |
| U5b3a1  | 7641.9  | 2988.3 |
| U5b3a1a | 2524.2  | 2290.8 |
| U5b3a1b | 4331.0  | 3671.1 |
| U5b3a2  | 6462.1  | 3656.4 |
| U5b3b   | 3722.8  | 6277.6 |
| U5b3c   | 3595.1  | 2856.1 |
| U5b3d   | 5183.2  | 3296.7 |
| U5b3e   | 4208.1  | 3884.0 |
| U5b3f   | 1970.6  | 2760.7 |
| U6      | 37253.2 | 5873.8 |
| U6abd   | 32132.9 | 5829.7 |
| U6a     | 25086.7 | 3744.5 |
| U6a1    | 20133.4 | 4941.3 |
| U6a1a   | 14977.8 | 5036.8 |
| U6a1a1  | 3069.3  | 3201.2 |
| U6a1a2  | 11058.4 | 4706.4 |
| U6a1b   | 17481.9 | 5374.5 |
| U6a1b1  | 8336.2  | 4816.5 |
| U6a2    | 18092.6 | 4493.4 |
| U6a2a   | 13861.8 | 4801.8 |
| U6a3    | 16277.4 | 5646.2 |

|         |         |        |
|---------|---------|--------|
| U6a3a   | 10225.7 | 5616.8 |
| U6a3a1  | 6245.5  | 3986.8 |
| U6a3b   | 15063.0 | 5323.1 |
| U6a4    | 9976.6  | 5396.5 |
| U6a5    | 12062.7 | 4581.5 |
| U6a5a   | 7931.3  | 4588.9 |
| U6a6    | 9965.6  | 4625.6 |
| U6a7    | 23218.8 | 4170.4 |
| U6a7a   | 2492.5  | 3318.7 |
| U6b     | 13997.4 | 5734.3 |
| U6b1    | 2915.6  | 3274.6 |
| U6b1a   | 1670.9  | 3443.5 |
| U6d     | 14365.2 | 5029.4 |
| U6d1    | 5678.5  | 3135.1 |
| U6d1a   | 1571.2  | 2246.7 |
| U6c     | 7592.8  | 4882.6 |
| U234789 | 45001.5 | 3186.5 |
| U2      | 42805.7 | 4493.4 |
| U2a     | 22693.8 | 8274.7 |
| U2b     | 29253.5 | 5815.0 |
| U2b1    | 22929.6 | 6365.7 |
| U2b2    | 5382.2  | 3421.5 |
| U2cd    | 39454.7 | 6042.7 |

|         |         |        |
|---------|---------|--------|
| U2c     | 29944.6 | 6593.3 |
| U2c1    | 22117.0 | 6696.1 |
| U2d     | 20780.9 | 5058.8 |
| U2d1    | 14659.9 | 5249.7 |
| U2d2    | 8599.4  | 5102.8 |
| U2e     | 19290.4 | 4097.0 |
| U2e123  | 17873.5 | 3392.1 |
| U2e1    | 14898.3 | 2790.0 |
| U2e1a   | 8363.6  | 3384.8 |
| U2e1a1  | 6153.6  | 2591.8 |
| U2e1a1a | 4293.6  | 2973.6 |
| U2e1a1b | 3722.8  | 2746.0 |
| U2e1b   | 11967.6 | 3179.2 |
| U2e1b1  | 3888.0  | 2966.3 |
| U2e1c   | 8895.9  | 4309.9 |
| U2e1d   | 7630.9  | 5477.3 |
| U2e1e   | 6586.7  | 4434.7 |
| U2e1f   | 11716.2 | 3854.7 |
| U2e2    | 12724.1 | 3722.5 |
| U2e2a   | 8736.6  | 2760.7 |
| U2e2a1  | 4694.9  | 3700.5 |
| U2e2a2  | 5683.8  | 2768.0 |
| U2e2a3  | 5608.4  | 3913.4 |

|        |         |         |
|--------|---------|---------|
| U2e2a4 | 6272.6  | 3553.6  |
| U2e3   | 1047.3  | 4500.8  |
| U3     | 32702.7 | 5704.9  |
| U3a    | 14818.8 | 4640.3  |
| U3a1   | 8912.4  | 3840.0  |
| U3a1a  | 6847.2  | 3825.3  |
| U3a1b  | 0.0     | 15925.3 |
| U3a1c  | 3478.1  | 4882.6  |
| U3a2   | 11336.8 | 4721.1  |
| U3b    | 18959.9 | 3906.1  |
| U3b1   | 16993.5 | 3913.4  |
| U3b1a  | 14433.1 | 4023.5  |
| U3b1b  | 1891.7  | 2628.5  |
| U3b2   | 18959.9 | 6563.9  |
| U3b2a  | 8720.1  | 5117.5  |
| U49    | 37141.0 | 5763.6  |
| U4     | 17493.5 | 3069.1  |
| U4a    | 14949.4 | 3348.1  |
| U4a1   | 7734.6  | 2628.5  |
| U4a1a  | 4700.3  | 4632.9  |
| U4a1a1 | 4700.3  | 3223.2  |
| U4a1b  | 4662.8  | 2474.3  |
| U4a1b1 | 3387.7  | 2547.8  |

|          |         |        |
|----------|---------|--------|
| U4a1c    | 1000.2  | 1387.7 |
| U4a1d    | 3255.0  | 3091.1 |
| U4a2     | 8802.5  | 2459.6 |
| U4a2a    | 4031.9  | 3781.2 |
| U4a2a1   | 2666.9  | 3436.2 |
| U4a2b    | 1865.4  | 2709.3 |
| U4a2c    | 7440.1  | 2738.7 |
| U4a2c1   | 1581.7  | 2085.2 |
| U4a2d    | 1865.4  | 2569.8 |
| U4a2e    | 3776.1  | 2679.9 |
| U4a2f    | 4491.4  | 2503.7 |
| U4a3     | 4144.0  | 2782.7 |
| U4b      | 12589.4 | 2804.7 |
| U4b1     | 11520.8 | 2790.0 |
| U4b1a    | 10120.5 | 2694.6 |
| U4b1a1   | 4652.1  | 3458.2 |
| U4b1a1a  | 2809.8  | 3113.1 |
| U4b1a1a1 | 733.9   | 2400.9 |
| U4b1a2   | 3159.5  | 1967.7 |
| U4b1a2a  | 1781.3  | 1644.7 |
| U4b1a3   | 4812.8  | 2819.4 |
| U4b1a3a  | 3483.4  | 2437.6 |
| U4b1a4   | 1345.7  | 2129.2 |



|         |         |        |
|---------|---------|--------|
| U4b1b   | 8199.3  | 3663.8 |
| U4b1b1  | 6353.8  | 3296.7 |
| U4b1b1a | 1120.5  | 4970.7 |
| U4b2    | 9143.5  | 3656.4 |
| U4b2a   | 7358.4  | 3516.9 |
| U4b3    | 9000.4  | 4030.9 |
| U4c     | 15199.5 | 3583.0 |
| U4c1    | 2281.4  | 2188.0 |
| U4c2    | 9452.0  | 4985.4 |
| U4d     | 14921.0 | 3627.1 |
| U4d1    | 8983.9  | 3715.2 |
| U4d1a   | 3132.9  | 2562.4 |
| U4d1a1  | 1770.8  | 1857.6 |
| U4d1b   | 1875.9  | 2555.1 |
| U4d2    | 6310.5  | 3906.1 |
| U9      | 23875.3 | 6483.2 |
| U9a     | 17292.2 | 6284.9 |
| U9a1    | 8281.4  | 4331.9 |
| U9b     | 18421.8 | 5873.8 |
| U9b1    | 8566.5  | 5014.7 |
| U7      | 18052.2 | 3729.9 |
| U7a     | 16718.3 | 3017.7 |
| U7a1    | 2629.9  | 2804.7 |

|        |         |        |
|--------|---------|--------|
| U7a2   | 14722.3 | 4500.8 |
| U7a3   | 14921.0 | 3392.1 |
| U7a4   | 1251.4  | 1740.1 |
| U7a5   | 11839.1 | 4368.6 |
| U7b    | 10513.9 | 5073.5 |
| U7b1   | 1607.9  | 7900.2 |
| U8     | 43034.1 | 3634.4 |
| U8a    | 18514.2 | 5168.9 |
| U8a1   | 8007.8  | 2929.5 |
| U8a1a  | 5629.9  | 2481.7 |
| U8a1a1 | 4315.0  | 2378.9 |
| U8a1a2 | 1178.1  | 1637.3 |
| U8a1b  | 3308.1  | 4787.1 |
| U8a2   | 6245.5  | 4603.6 |
| U8b    | 38433.3 | 4875.2 |
| U8b1   | 33070.9 | 7680.0 |
| U8b1a  | 28160.1 | 7158.7 |
| U8b1a1 | 21659.0 | 6857.6 |
| U8b1b  | 15506.9 | 7819.5 |
| U8b1b1 | 1839.1  | 2753.3 |
| K      | 26681.5 | 4339.3 |
| K1     | 22070.0 | 3333.4 |
| K1a    | 18433.3 | 1732.8 |

|           |         |        |
|-----------|---------|--------|
| K1a1      | 17010.8 | 2445.0 |
| K1a1a     | 9093.9  | 3539.0 |
| K1a1a2    | 7042.8  | 3105.8 |
| K1a1a2a   | 4812.8  | 2878.2 |
| K1a1a2a1  | 2450.3  | 2202.7 |
| K1a1b     | 16003.1 | 2503.7 |
| K1a1b1    | 14218.0 | 3017.7 |
| K1a1b1a   | 4823.6  | 3575.7 |
| K1a1b1b   | 7320.3  | 4471.4 |
| K1a1b1c   | 1797.0  | 9001.6 |
| K1a1b1d   | 1571.2  | 2210.0 |
| K1a1b1e   | 5905.0  | 5697.6 |
| K1a1b2    | 14750.7 | 2724.0 |
| K1a1b2a   | 9071.9  | 3450.8 |
| K1a1b2a1  | 4550.3  | 2467.0 |
| K1a1b2a1a | 2947.4  | 2092.5 |
| K1a1b2b   | 10452.9 | 4684.3 |
| K1a1c     | 5856.5  | 3825.3 |
| K1a2      | 13602.1 | 3164.5 |
| K1a2a     | 9165.5  | 3986.8 |
| K1a2a1    | 2376.4  | 2276.1 |
| K1a2b     | 9507.1  | 4383.3 |
| K1a2c     | 8786.0  | 3759.2 |

|           |         |        |
|-----------|---------|--------|
| K1a3      | 11141.9 | 3516.9 |
| K1a3a     | 9082.9  | 2760.7 |
| K1a3a1    | 4464.7  | 2195.3 |
| K1a3a1b   | 2899.8  | 2048.5 |
| K1a3a2    | 6104.9  | 2951.6 |
| K1a3a3    | 7004.7  | 3171.8 |
| K1a4      | 15940.3 | 2342.2 |
| K1a4a     | 14093.5 | 2679.9 |
| K1a4a1    | 9617.5  | 2327.5 |
| K1a4a1a   | 6045.5  | 2650.5 |
| K1a4a1a1  | 984.5   | 1402.4 |
| K1a4a1a2  | 4636.0  | 2430.3 |
| K1a4a1a2a | 2386.9  | 2180.6 |
| K1a4a1a2b | 1807.5  | 2276.1 |
| K1a4a1b   | 7570.9  | 2812.1 |
| K1a4a1b1  | 4298.9  | 3487.6 |
| K1a4a1b2  | 4636.0  | 2863.5 |
| K1a4a1c   | 5592.2  | 3289.3 |
| K1a4a1d   | 4963.0  | 3964.8 |
| K1a4a1e   | 4882.5  | 4155.7 |
| K1a4a1f   | 3738.8  | 3208.6 |
| K1a4a1f1  | 1534.4  | 2026.5 |
| K1a4b     | 12051.5 | 3524.3 |

|         |         |        |
|---------|---------|--------|
| K1a4c   | 10308.8 | 4442.0 |
| K1a4c1  | 3547.2  | 2760.7 |
| K1a4d   | 1471.5  | 2400.9 |
| K1a4f   | 6413.3  | 4229.1 |
| K1a4f1  | 2942.1  | 3179.2 |
| K1a5    | 4855.7  | 4537.5 |
| K1a78   | 15763.4 | 5587.4 |
| K1a8    | 7603.7  | 4111.6 |
| K1a8a   | 5597.6  | 3546.3 |
| K1a9    | 1691.9  | 2371.5 |
| K1a10   | 6413.3  | 3370.1 |
| K1a10a  | 2693.4  | 3531.6 |
| K1a13   | 3366.5  | 2665.2 |
| K1a13a  | 1518.7  | 1578.6 |
| K1a14   | 1544.9  | 2121.9 |
| K1a15   | 3366.5  | 4082.3 |
| K1a16   | 3106.4  | 3913.4 |
| K1a11   | 4769.9  | 2856.1 |
| K1a11a  | 1849.6  | 2305.5 |
| K1a11b  | 2434.5  | 2672.6 |
| K1a12   | 15097.1 | 4353.9 |
| K1a12a  | 12982.6 | 3913.4 |
| K1a12a1 | 11320.1 | 3957.5 |

|          |         |        |
|----------|---------|--------|
| K1a12a1a | 9750.0  | 4104.3 |
| K1a17    | 12085.1 | 3854.7 |
| K1a17a   | 9193.0  | 3700.5 |
| K1a18    | 14807.4 | 3215.9 |
| K1a19    | 14949.4 | 4442.0 |
| K1a20    | 5727.0  | 3627.1 |
| K1a21    | 2756.8  | 2701.9 |
| K1a22    | 10747.1 | 5000.1 |
| K1a23    | 16088.8 | 3472.9 |
| K1a24    | 10863.7 | 6042.7 |
| K1a24a   | 2297.3  | 2650.5 |
| K1a25    | 8572.0  | 4610.9 |
| K1b      | 20664.1 | 3392.1 |
| K1b1     | 16729.7 | 3421.5 |
| K1b1a    | 9971.1  | 3377.4 |
| K1b1a1   | 8122.7  | 3193.9 |
| K1b1a1a  | 1618.4  | 5749.0 |
| K1b1a1c  | 3584.4  | 3039.7 |
| K1b1b    | 10924.9 | 4126.3 |
| K1b1c    | 4652.1  | 3818.0 |
| K1b2     | 10791.5 | 5462.6 |
| K1b2a    | 5937.4  | 3700.5 |
| K1b2a1   | 4293.6  | 2459.6 |

|          |         |        |
|----------|---------|--------|
| K1b2a1a  | 3414.3  | 2298.1 |
| K1b2a1a1 | 1896.9  | 2239.4 |
| K1b2a2   | 3462.1  | 2217.4 |
| K1b2a2a  | 2339.5  | 1857.6 |
| K1b2b    | 6624.7  | 4449.4 |
| K1b2b1   | 3106.4  | 4045.6 |
| K1c      | 13935.2 | 6402.4 |
| K1c1     | 5215.5  | 1953.0 |
| K1c1b    | 2587.6  | 2224.7 |
| K1c1c    | 1508.2  | 1982.4 |
| K1c1d    | 1618.4  | 1490.5 |
| K1c1e    | 4026.6  | 2180.6 |
| K1c2     | 3824.0  | 3759.2 |
| K1c2a    | 3824.0  | 3744.5 |
| K1d      | 4341.7  | 4618.3 |
| K1e      | 9628.5  | 5257.0 |
| K1e1     | 3701.5  | 2936.9 |
| K2       | 21313.2 | 4618.3 |
| K2a      | 9104.9  | 2276.1 |
| K2a2     | 7658.2  | 3744.5 |
| K2a2a    | 1828.6  | 1938.3 |
| K2a3     | 6094.1  | 2584.5 |
| K2a3a    | 4786.0  | 2459.6 |

|        |         |        |
|--------|---------|--------|
| K2a3a1 | 3728.1  | 2276.1 |
| K2a4   | 3510.0  | 3942.8 |
| K2a5   | 6045.5  | 2848.8 |
| K2a5a  | 4368.4  | 2856.1 |
| K2a5a1 | 1728.7  | 1696.1 |
| K2a6   | 1886.4  | 2562.4 |
| K2a7   | 4818.2  | 3942.8 |
| K2a8   | 1513.5  | 2173.3 |
| K2a10  | 1881.2  | 3201.2 |
| K2b    | 14438.8 | 4655.0 |
| K2b1   | 6961.2  | 5954.5 |
| K2b1a  | 4684.2  | 5704.9 |
| K2b1a1 | 3403.7  | 2892.8 |
| K2b2   | 5075.8  | 3377.4 |



**Table S6. HVS-I Diagnostic Motifs of Major Haplogroups Relative to the RSRS**

| <b>Haplogroup</b> | <b>HVS-I as compared to the rCRS/<br/>previous nomenclature scheme</b> | <b>HVS-I as compared to the RSRS/<br/>suggested nomenclature scheme<sup>a,b</sup></b> |
|-------------------|------------------------------------------------------------------------|---------------------------------------------------------------------------------------|
| L0d               | 16129 16187 16189 16223 16230<br>16243 16311                           | T16243C                                                                               |
| L0k               | 16129 16166C 16172 16187<br>16189 16214 16223 16230<br>16291G 16311    | T16172C A16166c C16214T C16291g                                                       |
| L0f               | 16169 16187 16189 16223 16230<br>16278 16311 16327                     | C16169T T16172C C16327T C16354T<br>T16368C                                            |
| L0a               | 16148 16172 16187 16188G<br>16189 16223 16230 16311 16320              | CC16148T T16172C C16188g T16278C<br>C16320T                                           |
| L1b               | 16126 16187 16189 16223 16264<br>16270 16278 16311                     | T16126C A16129G G16230A C16264T<br>C16270T A16293G                                    |
| L1c               | 16129 16187 16189 16223 16278<br>16294 16311 16360                     | G16230A C16294T C16360T                                                               |
| L5                | 16129 16148 16166 16187 16189<br>16223 16278 16311                     | C16148T A16166G G16230A                                                               |
| L2                | 16223 16278 16390                                                      | A16129G T16187C C16189T G16230A<br>C16311T G16390A                                    |
| L6                | 16048 16223 16278 16224                                                | G16048A A16129G T16187C C16189T<br>T16224C G16230A                                    |
| L4                | 16223 16311 16362                                                      | A16129G T16187C C16189T G16230A                                                       |

|     |                                   |                                                                                       |
|-----|-----------------------------------|---------------------------------------------------------------------------------------|
|     |                                   | T16278C T16362C                                                                       |
| L3  | 16223                             | A16129G T16187C C16189T G16230A<br>T16278C C16311T                                    |
| M   | 16223                             | A16129G T16187C C16189T G16230A<br>T16278C C16311T                                    |
| M1  | 16129 16189 16223 16249 16311     | (G16129A!) T16187C (T16189C!)<br>G16230A T16249C T16278C (T16311C!)                   |
| C   | 16223 16298 16327                 | A16129G T16187C C16189T G16230A<br>T16278C T16298C C16311T C16327T                    |
| D   | 16223 16362                       | A16129G T16187C C16189T G16230A<br>T16278C C16311T T16362C                            |
| E   | 16223 16227 16362                 | A16129G T16187C C16189T G16230A<br>T16278C C16311T T16362C                            |
| Z   | 16185 16223 16224 16260 16298     | C16185T A16129G T16187C C16189T<br>T16224C G16230A C16260T T16278C<br>T16298C C16311T |
| N   | 16223                             | A16129G T16187C C16189T G16230A<br>T16278C C16311T                                    |
| N1a | 16147A 16172 16223 16248<br>16355 | A16129G C16147a T16172C T16187C<br>C16189T G16230A C16248T T16278C<br>C16311T C16355T |
| N1c | 16223 16265                       | A16129G T16187C C16189T C16201T<br>G16230A A16265G T16278C C16311T                    |

|     |                    |                                                                               |
|-----|--------------------|-------------------------------------------------------------------------------|
| I   | 16129 16223 16391  | (G16129A!) T16187C C16189T G16230A<br>T16278C C16311T G16391A                 |
| N1b | 16145 16176G 16223 | A16129G G16145A C16176a T16187C<br>C16189T G16230A T16278C C16311T            |
| A   | 16223 16290 16319  | A16129G T16187C C16189T T16223C<br>G16230A T16278C C16290T C16311T<br>G16319A |
| W   | 16223 16292        | A16129G T16187C C16189T G16230A<br>T16278C C16292T C16311T                    |
| X   | 16189 16223 16278  | A16129G T16187C (T16189C!) G16230A<br>(C16278T!) C16311T                      |
| R   | CRS                | A16129G T16187C C16189T T16223C<br>G16230A T16278C C16311T                    |
| U   | CRS                | A16129G T16187C C16189T T16223C<br>G16230A T16278C C16311T                    |
| U1  | 16249              | A16129G T16187C C16189T T16223C<br>G16230A T16249C T16278C C16311T            |
| U2  | 16051 16129C       | A16051G G16129c T16187C (T16189C!)<br>T16223C G16230A T16278C C16311T         |
| U3  | 16343              | A16129G T16187C C16189T T16223C<br>G16230A T16278C C16311T A16343G            |
| U4  | 16356              | A16129G T16187C C16189T T16223C<br>G16230A T16278C C16311T T16356C            |

|     |             |                                                                                  |
|-----|-------------|----------------------------------------------------------------------------------|
| U5  | 16270       | A16129G T16187C C16189T T16223C<br>G16230A C16270T T16278C C16311T               |
| U6  | 16172 16219 | A16129G T16172C T16187C (T16189C!)<br>A16219G T16223C G16230A T16278C<br>C16311T |
| U7  | 16318T      | A16129G T16187C C16189T T16223C<br>G16230A T16278C C16311T A16318t               |
| K   | 16224 16311 | A16129G T16187C C16189T T16223C<br>T16224C G16230A T16278C (T16311C!)            |
| R0a | 16126 16362 | T16126C A16129G T16187C C16189T<br>T16223C G16230A T16278C C16311T<br>T16362C    |
| HV  | CRS         | A16129G T16187C C16189T T16223C<br>G16230A T16278C C16311T                       |
| HV1 | 16067       | C16067T A16129G T16187C C16189T<br>T16223C G16230A T16278C C16311T               |
| H   | CRS         | A16129G T16187C C16189T T16223C<br>G16230A T16278C C16311T                       |
| V   | 16298       | A16129G T16187C C16189T T16223C<br>G16230A T16278C T16298C C16311T               |
| J   | 16069 16126 | C16069T T16126C A16129G T16187C<br>C16189T T16223C G16230A T16278C<br>C16311T    |

|   |             |                                                                               |
|---|-------------|-------------------------------------------------------------------------------|
| T | 16126 16294 | T16126C A16129G T16187C C16189T<br>T16223C G16230A T16278C C16294T<br>C16311T |
| F | 16304       | A16129G T16187C C16189T T16223C<br>G16230A T16278C T16304C C16311T            |
| B | 16189       | A16129G T16187C (T16189C!) T16223C<br>G16230A T16278C C16311T                 |

<sup>a</sup>Mutations noted in brackets represent the phylogenetic hierarchy on their respective path to the RSRS but will not be scored when directly compared to it as they have reverted back to the ancestral state.

<sup>b</sup>Note that mutation G16129c represents a sequence of mutational events including an A16129G transition followed by a G16129c transversion.
